# Supplementary material for: Facile synthesis of carbamoylated benzimidazo[2,1-a]isoquinolin-6(5H)-ones via radical cascade cyclization under metal-free conditions
Source: Royal Society of Chemistry journal article supplement (doi:10.1039/d1ob00101a), 2021-01-01

## ***Supporting Information***

# **Facile synthesis of carbamoylated benzimidazo[2,1-*a*]isoquinolin-6(5*H*)-ones via radical cascade cyclization under metal- free conditions**

Qi Liu,<sup>a</sup> Lei Wang,<sup>\*,a,b,c</sup> Jie Liu,<sup>\*,a</sup> Shuchen Ruan,<sup>a</sup> and Pinhua Li<sup>\*,a,c</sup>

<sup>a</sup> Department of Chemistry; Key Laboratory of Green and Precise Synthetic Chemistry, Ministry of Education, Huaibei Normal University, Huaibei, Anhui 235000, P. R. China

Fax: (+86)-561-309-0518; phone: (+86)-561-380-2069

E-mail: jieliu\_1024@163.com; pphuali@126.com

<sup>b</sup> Advanced Research Institute and Department of Chemistry, Taizhou University, Taizhou, Zhejiang 318000, P. R. China; E-mail: leiwang@chnu.edu.cn

<sup>c</sup> State Key Laboratory of Organometallic Chemistry, Shanghai Institute of Organic Chemistry, Shanghai 200032, P. R. China

### ***Contents***

|                                                                               |    |
|-------------------------------------------------------------------------------|----|
| 1. General considerations.....                                                | 2  |
| 2. Representative procedure for the model reaction.....                       | 2  |
| 3. Preliminary mechanistic investigation.....                                 | 4  |
| 4. X-Ray single crystal diffraction analysis of <b>3a</b> and <b>5c</b> ..... | 5  |
| 5. Characterization data for the products.....                                | 9  |
| 6. <sup>1</sup> H and <sup>13</sup> C NMR spectra of the products.....        | 29 |

## 1. General considerations

The  $^1\text{H}$  NMR and  $^{13}\text{C}$  NMR spectra were recorded on a 400 MHz Bruker FT-NMR spectrometer (400/100 MHz), and  $^{19}\text{F}$  NMR spectra were recorded on a 400 MHz Bruker FT-NMR spectrometer (377 MHz). All chemical shifts are given as  $\delta$  value (ppm) with reference to tetramethylsilane (TMS) as an internal standard. The peak patterns are indicated as follows: s, singlet; d, doublet; t, triplet; m, multiplet; q, quartet. The coupling constants,  $J$ , are reported in Hertz (Hz). High resolution mass spectroscopy data of the product were collected on an Agilent Technologies 6540 UHD Accurate-Mass Q-TOF LC/MS (ESI). All the solvents and commercially available reagents were purchased from commercial suppliers. Products were purified by flash chromatography on 200–300 mesh silica gels,  $\text{SiO}_2$ .

## 2. Representative procedure for the model reaction

### 2.1 Representative procedure for the reaction in 0.50 mmol scale

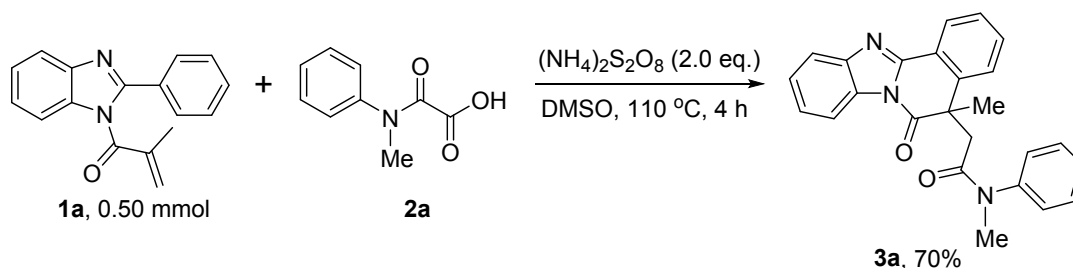

A 5 mL oven-dried reaction vessel equipped with a magnetic stirrer bar was charged with *N*-methacryloyl-2-phenylbenzimidazole (**1a**, 0.50 mmol), *N*-methyl-*N*-phenyl oxamic acid (**2a**, 0.60 mmol),  $(\text{NH}_4)_2\text{S}_2\text{O}_8$  (2.0 eq.) and DMSO (2.0 mL). The reaction vessel was stirred at 110 °C

for 4 h. After completion of the reaction, The mixture was then diluted with EtOAc and H<sub>2</sub>O, the aqueous layer was extracted with EtOAc (7.0 mL×3), the combined organic layer was washed with brine, dried with Na<sub>2</sub>SO<sub>4</sub>, concentrated under reduced pressure to afford crude product, which was further purified by flash chromatography (silica gel, petroleum ether/ethyl acetate = 5/1) to give the desired product **3a** (70% yield).

## 2.2 Representative procedure for the reaction in 5.0 mmol scale

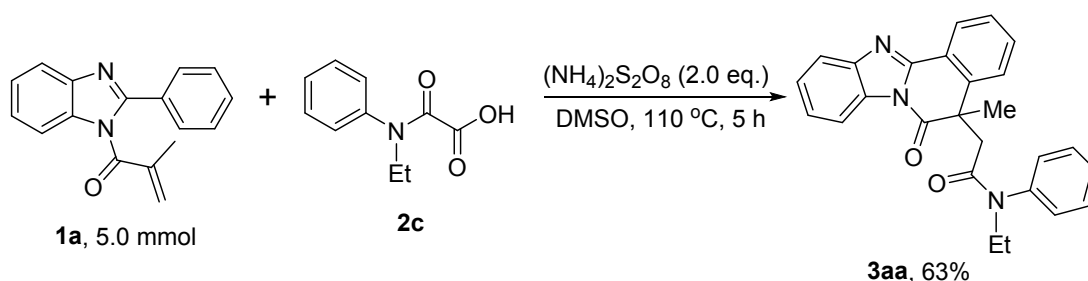

A 50 mL oven-dried reaction vessel equipped with a magnetic stirrer bar was charged with *N*-methacryloyl-2-phenylbenzimidazole (**1a**, 1.31 g, 5.0 mmol), *N*-ethyl-*N*-phenyl oxamic acid (**2c**, 6.0 mmol), (NH<sub>4</sub>)<sub>2</sub>S<sub>2</sub>O<sub>8</sub> (2.0 eq.) and DMSO (15.0 mL). The reaction vessel was stirred at 110 °C for 4 h. After completion of the reaction, The mixture was then diluted with EtOAc and H<sub>2</sub>O, the aqueous layer was extracted with EtOAc (30 ml×3), the combined organic layer was washed with brine, dried with Na<sub>2</sub>SO<sub>4</sub>, concentrated under reduced pressure to afford crude product, which was further purified by flash chromatography (silica gel, EtOAc/petroleum ether = 1:10) to give the desired product **3aa** (1.30 g, 63% yield).

### 3. Preliminary mechanistic investigation

#### Free-radical inhibition and trapping experiment

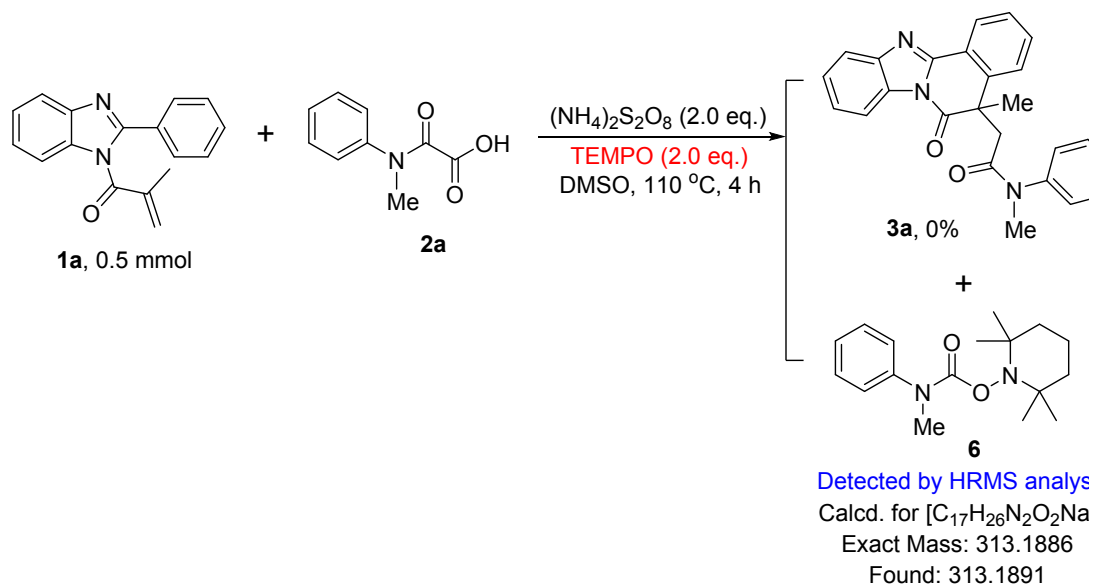

A 5 mL oven-dried sealed tube equipped with a magnetic stirrer bar was charged with *N*-methacryloyl-2-phenylbenzimidazole (**1a**, 0.50 mmol), *N*-methyl-*N*-phenyl oxamic acid (**2a**, 0.60 mmol),  $(\text{NH}_4)_2\text{S}_2\text{O}_8$  (2.0 eq.), TEMPO (1.00 mmol, 2.0 eq.) and DMSO (2.0 mL). The reaction vessel was stirred at 110 °C for 4 h. After completion of the reaction, TLC detection showed that the reaction was completely inhibited and no desired product **3a** was found, indicating a radical pathway involved in the reaction. Meanwhile, the key intermediate **A** was captured by TEMPO as a free-radical trapping reagent and its corresponding adduct **6** was detected by high-resolution mass spectrum (HRMS) analysis (Figure S1).

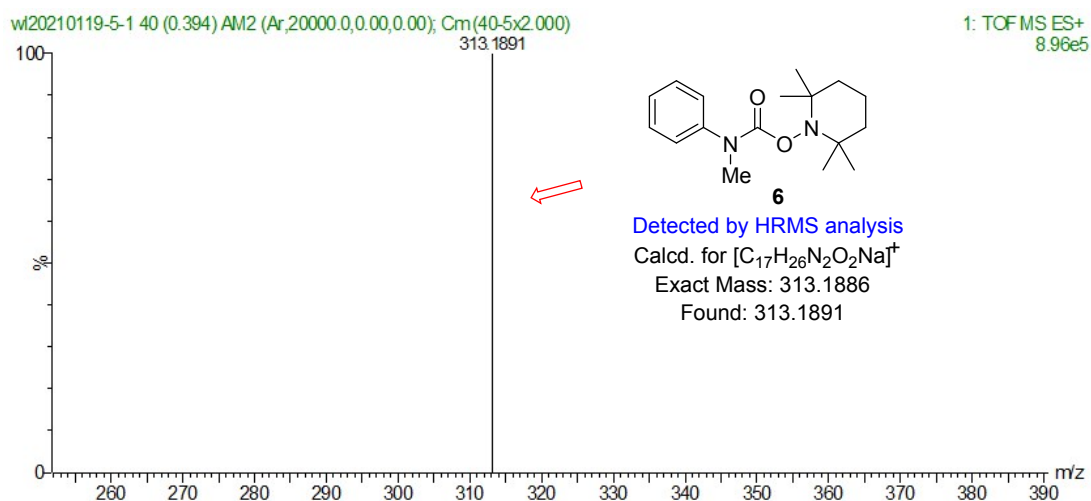

Figure S1. HRMS analysis of the adduct **6** from intermediate **A** and TEMPO

#### 4. X-Ray single crystal diffraction analysis of **3a** (CCDC: 2053319) and **5c** (CCDC: 2053320)

*N*-Methyl-2-(5-methyl-6-oxo-5,6-dihydrobenzo[4,5]imidazo[2,1-*a*]isoquinolin-5-yl)-*N*-phenylacetamide (**3a**, CCDC: 2053319)

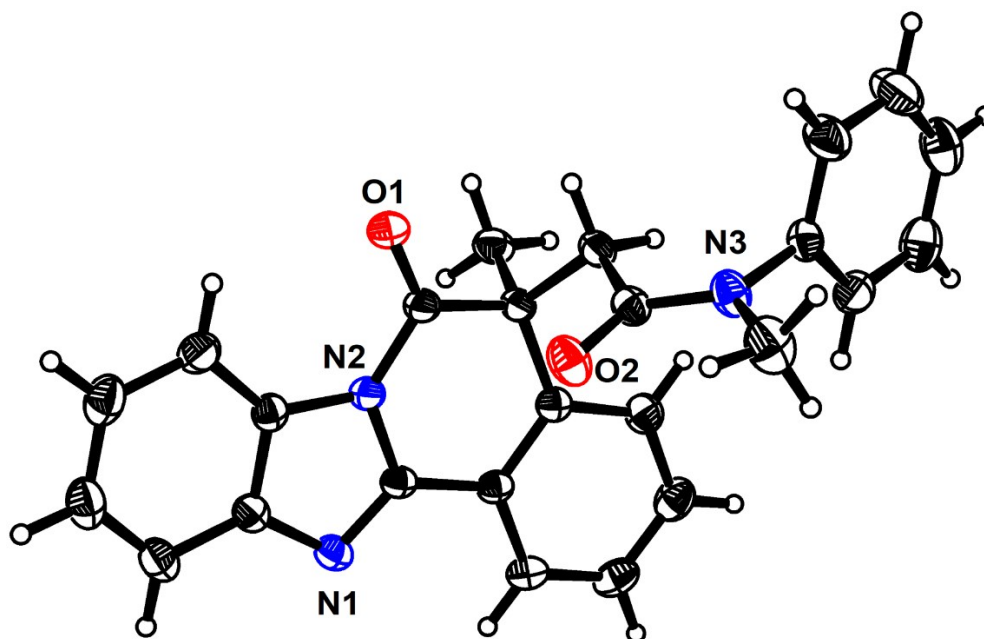

## checkCIF/PLATON report

Structure factors have been supplied for datablock(s) 1

THIS REPORT IS FOR GUIDANCE ONLY. IF USED AS PART OF A REVIEW PROCEDURE FOR PUBLICATION, IT SHOULD NOT REPLACE THE EXPERTISE OF AN EXPERIENCED CRYSTALLOGRAPHIC REFEREE.

No syntax errors found. [CIF dictionary](#) [Interpreting this report](#)

### Datablock: 1

---

|                        |                            |                                    |                            |
|------------------------|----------------------------|------------------------------------|----------------------------|
| Bond precision:        | C-C = 0.0021 A             | Wavelength=0.71073                 |                            |
| Cell:                  | a=14.7925 (18)<br>alpha=90 | b=10.7843 (13)<br>beta=111.899 (2) | c=13.5803 (17)<br>gamma=90 |
| Temperature:           | 296 K                      |                                    |                            |
|                        | Calculated                 | Reported                           |                            |
| Volume                 | 2010.1 (4)                 | 2010.1 (4)                         |                            |
| Space group            | P 21/c                     | P 21/c                             |                            |
| Hall group             | -P 2ybc                    | -P 2ybc                            |                            |
| Moiety formula         | C25 H21 N3 O2              | ?                                  |                            |
| Sum formula            | C25 H21 N3 O2              | C25 H21 N3 O2                      |                            |
| Mr                     | 395.45                     | 395.45                             |                            |
| Dx, g cm <sup>-3</sup> | 1.307                      | 1.307                              |                            |
| Z                      | 4                          | 4                                  |                            |
| Mu (mm <sup>-1</sup> ) | 0.084                      | 0.084                              |                            |
| F000                   | 832.0                      | 832.0                              |                            |
| F000'                  | 832.33                     |                                    |                            |
| h, k, lmax             | 17, 12, 16                 | 17, 12, 16                         |                            |
| Nref                   | 3537                       | 3529                               |                            |
| Tmin, Tmax             | 0.978, 0.982               |                                    |                            |
| Tmin'                  | 0.978                      |                                    |                            |

Correction method= Not given

Data completeness= 0.998                      Theta(max)= 25.000

R(reflections)= 0.0348 ( 2760)              wR2(reflections)= 0.1018 ( 3529)

S = 0.951                                          Npar= 274

---

The following ALERTS were generated. Each ALERT has the format  
**test-name\_ALERT\_alert-type\_alert-level.**  
Click on the hyperlinks for more details of the test.

---

**5-(((4-Bromophenyl)sulfonyl)methyl)-5-methylbenzo[4,5]imidazo[2,1-*a*]isoquinolin-6(5*H*)-one (5c, CCDC: 2053320)**

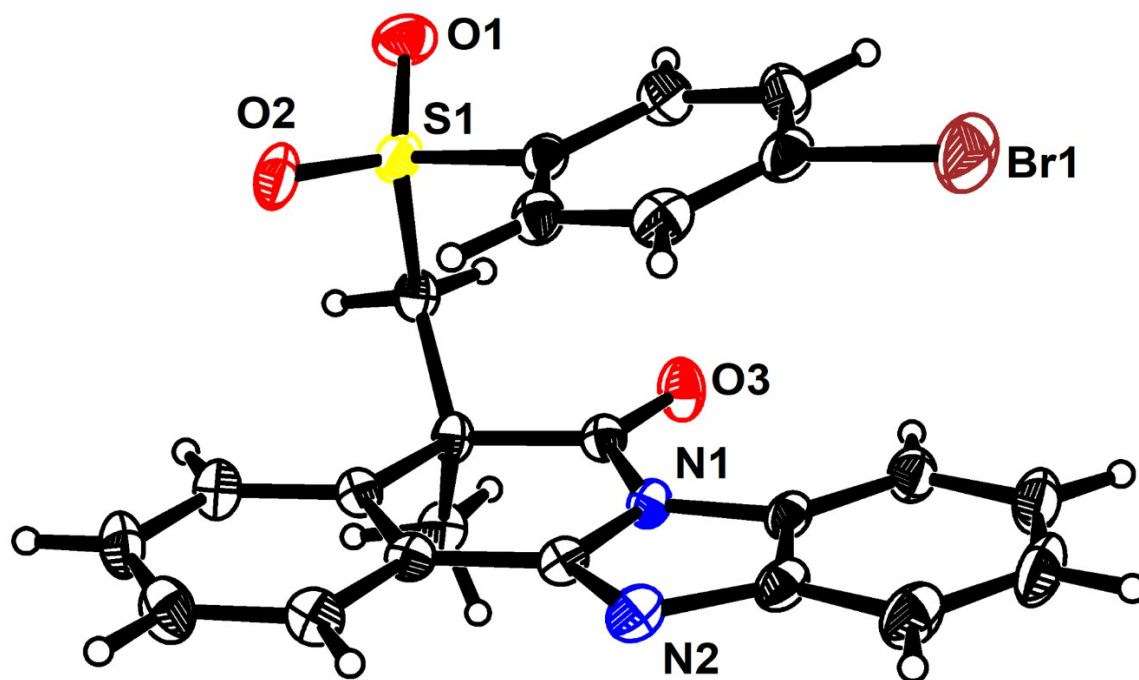

## checkCIF/PLATON report

Structure factors have been supplied for datablock(s) 1

THIS REPORT IS FOR GUIDANCE ONLY. IF USED AS PART OF A REVIEW PROCEDURE FOR PUBLICATION, IT SHOULD NOT REPLACE THE EXPERTISE OF AN EXPERIENCED CRYSTALLOGRAPHIC REFEREE.

No syntax errors found. [CIF dictionary](#) [Interpreting this report](#)

### Datablock: 1

---

Bond precision: C-C = 0.0043 A Wavelength=0.71073

Cell: a=13.3305(12) b=7.3656(7) c=20.434(2)  
alpha=90 beta=94.098(2) gamma=90  
Temperature: 296 K

|                | Calculated         | Reported           |
|----------------|--------------------|--------------------|
| Volume         | 2001.2(3)          | 2001.2(3)          |
| Space group    | P 21/n             | P 21/n             |
| Hall group     | -P 2yn             | -P 2yn             |
| Moiety formula | C23 H17 Br N2 O3 S | ?                  |
| Sum formula    | C23 H17 Br N2 O3 S | C23 H17 Br N2 O3 S |
| Mr             | 481.35             | 481.35             |
| Dx, g cm-3     | 1.598              | 1.598              |
| Z              | 4                  | 4                  |
| Mu (mm-1)      | 2.187              | 2.187              |
| F000           | 976.0              | 976.0              |
| F000'          | 975.72             |                    |
| h, k, lmax     | 15, 8, 24          | 15, 8, 24          |
| Nref           | 3518               | 3511               |
| Tmin, Tmax     | 0.598, 0.705       |                    |
| Tmin'          | 0.561              |                    |

Correction method= Not given

Data completeness= 0.998 Theta(max)= 24.997

R(reflections)= 0.0402( 2574) wR2(reflections)= 0.1005( 3511)

S = 0.987 Npar= 272

---

The following ALERTS were generated. Each ALERT has the format  
**test-name ALERT alert-type alert-level.**  
Click on the hyperlinks for more details of the test.

---



## 5. Characterization data for the products

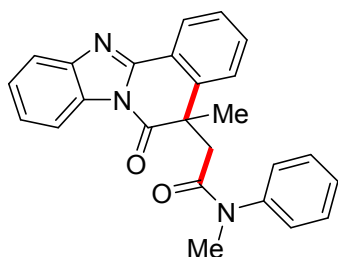

***N*-Methyl-2-(5-methyl-6-oxo-5,6-dihydrobenzo[4,5]imidazo[2,1-*a*]isoquinolin-5-yl)-*N*-phenylacetamide (3a):** White solid; mp: 190.8–192.4 °C; <sup>1</sup>H NMR (400 MHz, CDCl<sub>3</sub>) δ: 8.53 (dd, *J*<sub>1</sub> = 1.6 Hz, *J*<sub>2</sub> = 7.6 Hz, 1H), 8.41–8.39 (m, 1H), 7.84–7.82 (m, 1H), 7.53–7.37 (m, 7H), 7.20 (d, *J* = 7.2 Hz, 2H), 7.13 (d, *J* = 7.6 Hz, 1H), 3.49 (d, *J* = 17.2 Hz, 1H), 3.02–2.98 (m, 4H), 1.45 (s, 3H). <sup>13</sup>C NMR (100 MHz, CDCl<sub>3</sub>) δ: 173.5, 169.0, 150.0, 144.0, 143.5, 142.2, 131.8, 131.5, 130.2, 128.4, 127.5, 127.3, 126.5, 125.5, 125.3, 124.5, 123.1, 119.7, 115.7, 47.1, 45.0, 37.2, 29.9. HRMS (ESI) ([M+H]<sup>+</sup>) Calcd. For [C<sub>25</sub>H<sub>22</sub>N<sub>3</sub>O<sub>2</sub>]<sup>+</sup>: 396.1707, Found: 396.1705.

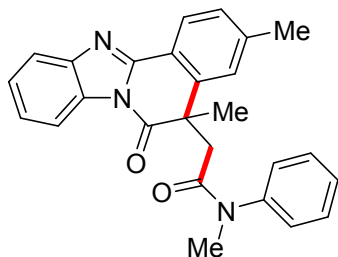

**2-(3,5-Dimethyl-6-oxo-5,6-dihydrobenzo[4,5]imidazo[2,1-*a*]isoquinolin-5-yl)-*N*-methyl-*N*-phenylacetamide (3b):** White solid; mp: 212.1–213.5 °C; <sup>1</sup>H NMR (400 MHz, CDCl<sub>3</sub>) δ: 8.41–8.38 (m, 2H), 7.84–7.77 (m, 1H), 7.51 (t, *J* = 7.5 Hz, 2H), 7.44–7.35 (m, 3H), 7.28–7.26 (m, 1H), 7.19 (d, *J* = 7.2 Hz, 2H), 6.90 (s, 1H), 3.47 (d, *J* = 16.8 Hz, 1H), 3.01–2.97 (m, 4H), 2.44 (s, 3H), 1.43 (s, 3H). <sup>13</sup>C NMR (100 MHz, CDCl<sub>3</sub>) δ: 173.4, 168.9, 150.0, 144.0, 143.3, 141.9, 141.6, 131.6, 130.0, 128.4, 128.2, 127.1, 126.1, 125.2, 124.9, 124.8, 120.3, 119.3, 115.5, 46.8, 44.6, 37.0, 29.7, 21.8. HRMS (ESI) ([M+H]<sup>+</sup>) Calcd. For [C<sub>26</sub>H<sub>24</sub>N<sub>3</sub>O<sub>2</sub>]<sup>+</sup>: 410.1863, Found: 410.1859.

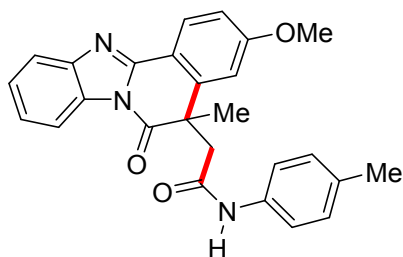

**2-(3-Methoxy-5-methyl-6-oxo-5,6-dihydrobenzo[4,5]imidazo[2,1-*a*]isoquinolin-5-yl)-*N*-(*p*-tolyl)acetamide (3c):** White solid; mp: 214.3–216.7 °C; <sup>1</sup>H NMR (400 MHz, DMSO-*d*<sub>6</sub>) δ: 10.02 (s, 1H), 8.33–8.28 (m, 2H), 7.82–7.80 (m, 1H), 7.47–7.39 (m, 2H), 7.23–7.21 (m, 3H), 7.10 (dd, *J*<sub>1</sub> = 2.4 Hz, *J*<sub>2</sub> = 8.8 Hz, 1H), 6.96 (d, *J* = 8.4 Hz, 1H), 3.89 (s, 3H), 3.66 (d, *J* = 16.8 Hz, 1H), 3.55 (d, *J* =

16.8 Hz, 1H), 2.15 (s, 3H), 1.63 (s, 3H).  $^{13}\text{C}$  NMR (100 MHz, DMSO- $d_6$ )  $\delta$ : 173.2, 167.8, 162.1, 150.0, 144.3, 143.9, 136.0, 132.2, 131.2, 129.0, 127.3, 125.4, 124.6, 119.1, 118.9, 115.2, 115.0, 113.5, 111.4, 55.6, 46.6, 46.5, 29.3, 20.3. HRMS (ESI) ( $[\text{M}+\text{H}]^+$ ) Calcd. For  $[\text{C}_{26}\text{H}_{24}\text{N}_3\text{O}_3]^+$ : 426.1812, Found: 426.1815.

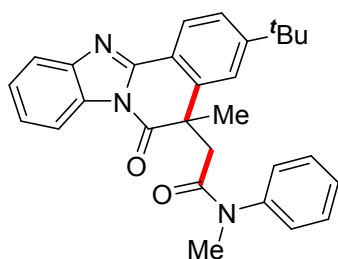

**2-(3-(*tert*-Butyl)-5-methyl-6-oxo-5,6-dihydrobenzo[4,5]imidazo[2,1-*a*]isoquinolin-5-yl)-*N*-methyl-*N*-phenylacetamide (3d):** White solid; mp: 184.1–186.4 °C;  $^1\text{H}$  NMR (400 MHz,  $\text{CDCl}_3$ )  $\delta$ : 8.45–8.39 (m, 2H), 7.83–7.81 (m, 1H), 7.52–7.37 (m, 6H), 7.18 (d,  $J = 7.2$  Hz, 2H), 7.11–7.10 (m, 1H), 3.50 (d,  $J = 16.8$  Hz, 1H), 3.05–3.00 (m, 4H), 1.46 (s, 3H), 1.37 (s, 10H).  $^{13}\text{C}$  NMR (100 MHz,  $\text{CDCl}_3$ )  $\delta$ : 173.7, 168.9, 154.7, 150.0, 144.1, 143.4, 141.6, 131.7, 130.0, 128.2, 127.1, 126.1, 125.2, 124.9, 120.9, 120.4, 119.4, 115.6, 47.0, 45.1, 37.1, 35.1, 31.1, 29.9. HRMS (ESI) ( $[\text{M}+\text{H}]^+$ ) Calcd. For  $[\text{C}_{29}\text{H}_{30}\text{N}_3\text{O}_2]^+$ : 452.2333, Found: 452.2337.

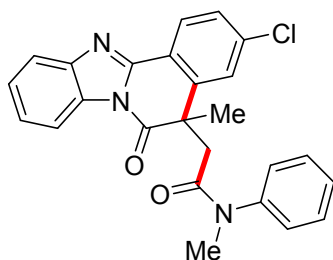

**2-(3-Chloro-5-methyl-6-oxo-5,6-dihydrobenzo[4,5]imidazo[2,1-a]isoquinolin-5-yl)-N-methyl-N-phenylacetamide (3e):** White solid; mp: 192.9–194.6 °C;  $^1\text{H}$  NMR (400 MHz,  $\text{CDCl}_3$ )  $\delta$ : 8.46 (d,  $J = 8.4$  Hz, 1H), 8.39–8.37 (m, 1H), 7.82–7.80 (m, 1H), 7.54 (t,  $J = 7.6$  Hz, 2H), 7.47–7.40 (m, 4H), 7.22 (d,  $J = 7.2$  Hz, 2H), 7.10–7.09 (m, 1H), 3.50 (d,  $J = 16.8$  Hz, 1H), 3.01 (s, 3H), 2.92 (d,  $J = 16.8$  Hz, 1H), 1.45 (s, 3H).  $^{13}\text{C}$  NMR (100 MHz,  $\text{CDCl}_3$ )  $\delta$ : 172.5, 168.7, 148.9, 143.9, 143.6, 143.1, 137.2, 131.5, 130.1, 128.3, 127.9, 127.6, 127.2, 125.5, 125.3, 124.8, 121.7, 119.6, 115.5, 47.0, 44.6, 37.1, 29.4. HRMS (ESI) ( $[\text{M}+\text{H}]^+$ ) Calcd. For  $[\text{C}_{25}\text{H}_{21}\text{ClN}_3\text{O}_2]^+$ : 430.1317, Found: 430.1320.

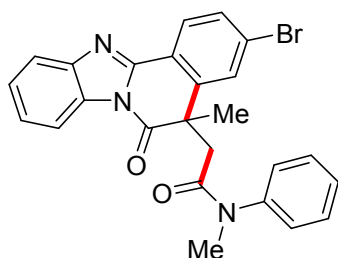

**2-(3-Bromo-5-methyl-6-oxo-5,6-dihydrobenzo[4,5]imidazo[2,1-a]isoquinolin-5-yl)-N-methyl-N-phenylacetamide (3f):** White solid;

mp: 214.6–216.2 °C; <sup>1</sup>H NMR (400 MHz, CDCl<sub>3</sub>) δ: 8.39–8.37 (m, 2H), 7.82–7.80 (m, 1H), 7.61–7.52 (m, 3H), 7.47–7.39 (m, 3H), 7.27–7.21 (m, 3H), 3.50 (d, *J* = 16.8 Hz, 1H), 3.01 (s, 3H), 2.92 (d, *J* = 16.8 Hz, 1H), 1.45 (s, 3H). <sup>13</sup>C NMR (100 MHz, CDCl<sub>3</sub>) δ: 172.5, 168.7, 148.9, 143.9, 143.7, 143.2, 131.6, 130.8, 130.2, 128.4, 127.8, 127.7, 127.2, 125.7, 125.5, 125.4, 122.1, 119.6, 115.6, 47.0, 44.6, 37.1, 29.4. HRMS (ESI) ([M+H]<sup>+</sup>) Calcd. For [C<sub>25</sub>H<sub>20</sub>BrN<sub>3</sub>O<sub>2</sub>]<sup>+</sup>: 474.0812, Found: 474.0820.

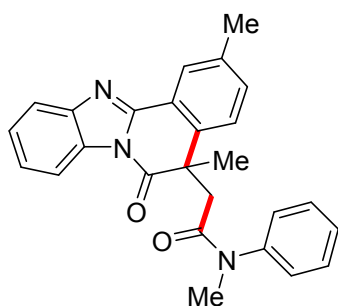

**2-(2,5-Dimethyl-6-oxo-5,6-dihydrobenzo[4,5]imidazo[2,1-a]isoquinolin-5-yl)-N-methyl-N-phenylacetamide (3g):** White solid; mp: 178.4–181.3 °C; <sup>1</sup>H NMR (400 MHz, CDCl<sub>3</sub>) δ: 8.41–8.38 (m, 1H), 8.34 (s, 1H), 7.83–7.81 (m, 1H), 7.50 (t, *J* = 7.6 Hz, 2H), 7.44–7.37 (m, 3H), 7.32 (dd, *J*<sub>1</sub> = 2.0 Hz, *J*<sub>2</sub> = 8.0 Hz, 1H), 7.21–7.19 (m, 2H), 7.02 (d, *J* = 8.0 Hz, 1H), 3.47 (d, *J* = 16.8 Hz, 1H), 2.99–2.95 (m, 4H), 2.44 (s, 3H), 1.42 (s, 3H). <sup>13</sup>C NMR (100 MHz, CDCl<sub>3</sub>) δ: 173.5, 168.9, 150.0, 143.9, 143.3, 139.1, 137.2,

132.3, 131.6, 130.0, 128.2, 127.2, 126.4, 125.3, 125.0, 124.2, 122.7, 119.4, 115.6, 46.6, 44.8, 37.0, 29.7, 20.8. HRMS (ESI) ( $[M+H]^+$ ) Calcd. For  $[C_{26}H_{24}N_3O_2]^+$ : 410.1863, Found: 410.1867.

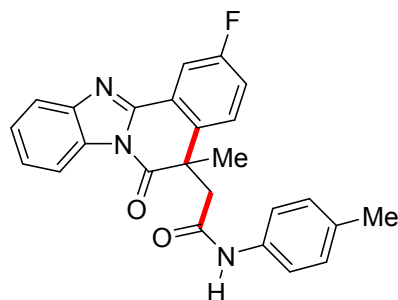

**2-(2-Fluoro-5-methyl-6-oxo-5,6-dihydrobenzo[4,5]imidazo[2,1-*a*]isoquinolin-5-yl)-*N*-(*p*-tolyl)acetamide (3h):** White solid; mp: 267.3–269.6 °C;  $^1H$  NMR (400 MHz,  $CDCl_3$ )  $\delta$ : 10.03 (s, 1H), 8.31–8.29 (m, 1H), 8.05 (dd,  $J_1 = 2.8$  Hz,  $J_2 = 8.8$  Hz, 1H), 7.88–7.86 (m, 1H), 7.81–7.77 (m, 1H), 7.49–7.47 (m, 3H), 7.19 (d,  $J = 8.0$  Hz, 2H), 6.95 (d,  $J = 8.0$  Hz, 2H), 3.65 (d,  $J = 16.8$  Hz, 1H), 3.54–3.48 (m, 2H), 2.13 (s, 3H), 1.66 (s, 3H).  $^{13}C$  NMR (100 MHz,  $CDCl_3$ )  $\delta$ : 173.0, 167.7, 160.9 ( $J = 242.8$  Hz), 148.9 ( $J = 3.6$  Hz), 143.5, 138.4 ( $J = 3.2$  Hz), 135.9, 132.3, 131.3, 129.0, 128.8 ( $J = 8.3$  Hz), 125.6 ( $J = 8.7$  Hz), 124.5, 124.5, 119.8, 119.0 ( $J = 21.8$  Hz), 118.9, 115.2, 111.9 ( $J = 23.6$  Hz), 47.0, 46.1, 28.8, 20.3.  $^{19}F$  NMR (377 MHz,  $CDCl_3$ )  $\delta$ : -114.29. HRMS (ESI) ( $[M+H]^+$ ) Calcd. For  $[C_{25}H_{21}FN_3O_2]^+$ : 414.1612, Found: 414.1620.

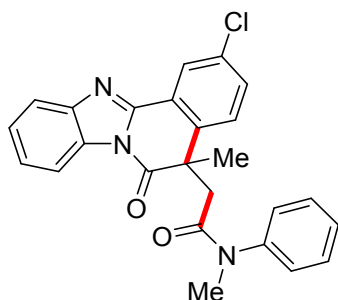

**2-(2-Chloro-5-methyl-6-oxo-5,6-dihydrobenzo[4,5]imidazo[2,1-a]isoquinolin-5-yl)-N-methyl-N-phenylacetamide (3i):** White solid; mp: 208.7–211.5 °C;  $^1\text{H}$  NMR (400 MHz,  $\text{CDCl}_3$ )  $\delta$ : 8.52 (d,  $J = 2.4$  Hz, 1H), 8.39–8.37 (m, 1H), 7.84–7.82 (m, 1H), 7.54–7.41 (m, 6H), 7.21 (d,  $J = 7.2$  Hz, 2H), 7.07 (d,  $J = 8.4$  Hz, 1H), 3.50 (d,  $J = 17.2$  Hz, 1H), 3.00–2.92 (m, 4H), 1.44 (s, 3H).  $^{13}\text{C}$  NMR (100 MHz,  $\text{CDCl}_3$ )  $\delta$ : 172.8, 168.8, 148.6, 143.9, 143.2, 140.4, 133.6, 131.7, 131.3, 130.2, 128.3, 127.2, 126.0, 125.9, 125.6, 125.5, 124.8, 119.8, 115.7, 46.8, 45.0, 37.1, 29.5. HRMS (ESI) ( $[\text{M}+\text{H}]^+$ ) Calcd. For  $[\text{C}_{25}\text{H}_{21}\text{ClN}_3\text{O}_2]^+$ : 430.1317, Found: 430.1322.

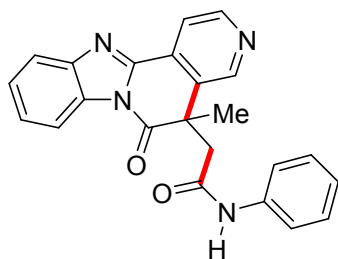

**2-(5-Methyl-6-oxo-5,6-dihydrobenzo[4,5]imidazo[2,1-*a*][2,6]naphthyridin-5-yl)-*N*-phenylacetamide (3j):** White solid; mp: 157.8–162.4 °C; <sup>1</sup>H NMR (400 MHz, DMSO-*d*<sub>6</sub>) δ: 10.17 (s, 1H), 9.08 (s, 1H), 8.71 (d, *J* = 5.2 Hz, 1H), 8.34–8.32 (m, 1H), 8.22 (d, *J* = 5.2 Hz, 1H), 7.95–7.93 (m, 1H), 7.55–7.53 (m, 2H), 7.28 (d, *J* = 8.0 Hz, 2H), 7.17–7.13 (m, 2H), 6.94 (t, *J* = 7.2 Hz, 1H), 3.69 (s, 2H), 1.75 (s, 3H). <sup>13</sup>C NMR (100 MHz, DMSO-*d*<sub>6</sub>) δ: 172.4, 167.9, 148.3, 147.9, 143.4, 138.2, 136.2, 131.3, 129.4, 128.6, 126.3, 125.9, 123.4, 120.2, 119.0, 117.7, 115.3, 46.7, 44.9, 28.1. HRMS (ESI) ([M+H]<sup>+</sup>) Calcd. For [C<sub>23</sub>H<sub>19</sub>N<sub>4</sub>O<sub>2</sub>]<sup>+</sup>: 383.1503, Found: 383.1512.

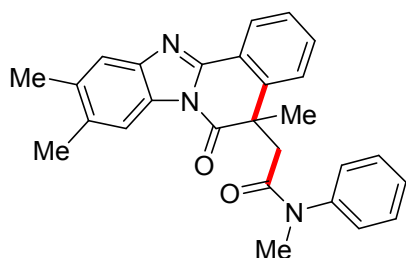

***N*-Methyl-*N*-phenyl-2-(5,9,10-trimethyl-6-oxo-5,6-dihydrobenzo[4,5]imidazo[2,1-*a*]isoquinolin-5-yl)acetamide (3k):** White solid; mp: 204.2–206.9 °C; <sup>1</sup>H NMR (400 MHz, CDCl<sub>3</sub>) δ: 8.40 (dd, *J*<sub>1</sub> = 1.6, *J*<sub>2</sub> = 7.6 Hz, 1H), 8.10 (s, 1H), 7.50 (s, 1H), 7.44–7.32 (m, 5H), 7.12 (d, *J* = 6.8 Hz, 2H), 7.03 (d, *J* = 7.6 Hz, 1H), 3.39 (d, *J* = 16.8 Hz, 1H), 2.92–2.88 (m, 4H), 2.32 (d, *J* = 3.2 Hz, 6H), 1.35 (s, 3H). <sup>13</sup>C NMR (100 MHz, CDCl<sub>3</sub>) δ: 173.4, 168.9,



149.1, 143.4, 142.5, 141.8, 134.3, 134.2, 130.9, 130.1, 130.0, 128.2, 127.3, 127.2, 126.1, 124.3, 123.3, 119.8, 115.9, 46.8, 44.8, 37.1, 29.8, 20.4. HRMS (ESI) ( $[M+H]^+$ ) Calcd. For  $[C_{27}H_{26}N_3O_2]^+$ : 424.2020, Found: 424.2019.

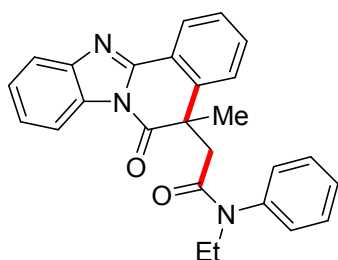

***N*-Ethyl-2-(5-methyl-6-oxo-5,6-dihydrobenzo[4,5]imidazo[2,1-*a*]isoquinolin-5-yl)-*N*-phenylacetamide (3aa):** White solid; mp: 175.6–178.9 °C;  $^1H$  NMR (400 MHz,  $CDCl_3$ )  $\delta$ : 8.45 (dd,  $J_1 = 1.6$  Hz,  $J_2 = 7.6$  Hz, 1H), 8.33–8.31 (m, 1H), 7.76–7.74 (m, 1H), 7.46–7.30 (m, 7H), 7.11–7.04 (m, 3H), 3.49–3.26 (m, 3H), 2.84 (d,  $J = 16.4$  Hz, 1H), 1.37 (s, 3H), 0.78 (t,  $J = 7.2$  Hz, 3H).  $^{13}C$  NMR (100 MHz,  $CDCl_3$ )  $\delta$ : 173.4, 168.9, 149.1, 143.4, 142.5, 141.8, 134.3, 134.2, 130.9, 130.1, 130.0, 128.2, 127.3, 127.2, 126.1, 124.3, 123.3, 119.8, 115.9, 46.8, 44.8, 37.1, 29.8, 20.4. HRMS (ESI) ( $[M+H]^+$ ) Calcd. For  $[C_{26}H_{24}N_3O_2]^+$ : 410.1863, Found: 410.1866.

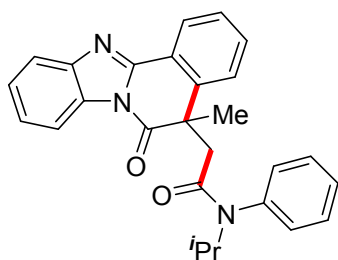

***N*-(*iso*-Propyl)-2-(5-methyl-6-oxo-5,6-dihydrobenzo[4,5]imidazo[2,1-*a*]isoquinolin-5-yl)-*N*-phenylacetamide (3ab):** White solid; mp: 209.5–211.6 °C; <sup>1</sup>H NMR (400 MHz, CDCl<sub>3</sub>) δ: 8.53 (d, *J* = 8.0 Hz, 1H), 8.41–8.39 (m, 1H), 7.84–7.82 (m, 1H), 7.55–7.38 (m, 7H), 7.18–7.07 (m, 3H), 4.66–4.59 (m, 1H), 3.37 (d, *J* = 16.4 Hz, 1H), 2.80 (d, *J* = 16.8 Hz, 1H), 1.43 (s, 3H), 0.81 (dd, *J*<sub>1</sub> = 6.8 Hz, *J*<sub>2</sub> = 25.6 Hz, 6H). <sup>13</sup>C NMR (100 MHz, CDCl<sub>3</sub>) δ: 173.4, 168.3, 149.9, 144.0, 142.1, 138.1, 131.7, 131.1, 130.6, 129.5, 128.6, 127.4, 126.3, 125.3, 125.1, 124.4, 123.1, 119.6, 115.6, 47.1, 45.9, 45.8, 29.6, 20.9, 20.5. HRMS (ESI) ([M+H]<sup>+</sup>) Calcd. For [C<sub>27</sub>H<sub>26</sub>N<sub>3</sub>O<sub>2</sub>]<sup>+</sup>: 424.2020, Found: 424.2026.

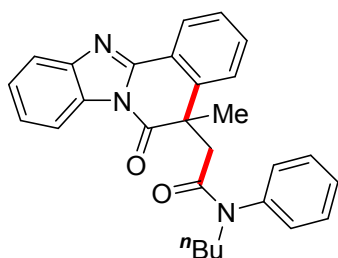

***N*-(*n*-Butyl)-2-(5-methyl-6-oxo-5,6-dihydrobenzo[4,5]imidazo[2,1-*a*]isoquinolin-5-yl)-*N*-phenylacetamide (3ac):** White solid; mp:

107.1–110.2 °C; <sup>1</sup>H NMR (400 MHz, CDCl<sub>3</sub>) δ: 8.44–8.31 (m, 2H), 7.73 (d, *J* = 7.2 Hz, 1H), 7.41–7.32 (m, 7H), 7.08–7.03 (m, 3H), 3.39–3.26 (m, 3H), 2.82 (d, *J* = 16.8 Hz, 1H), 1.34 (s, 3H), 1.16–1.11 (m, 2H), 0.91 (s, 2H), 0.59 (s, 3H). <sup>13</sup>C NMR (100 Mhz, CDCl<sub>3</sub>) δ: 173.3, 168.4, 149.8, 143.9, 141.92, 141.89, 131.6, 131.1, 129.9, 128.2, 128.1, 127.3, 126.2, 125.3, 125.0, 124.3, 123.0, 119.5, 115.6, 48.7, 47.0, 45.0, 29.6, 29.4, 19.5, 13.5. HRMS (ESI) ([M+Na]<sup>+</sup>) Calcd. For [C<sub>28</sub>H<sub>27</sub>N<sub>3</sub>NaO<sub>2</sub>]<sup>+</sup>: 460.1995, Found: 460.1997.

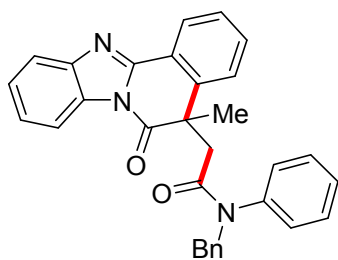

***N*-Benzyl-2-(5-methyl-6-oxo-5,6-dihydrobenzo[4,5]imidazo[2,1-*a*]isoquinolin-5-yl)-*N*-phenylacetamide (3ad):** White solid; mp: 183.6–185.0 °C; <sup>1</sup>H NMR (400 MHz, CDCl<sub>3</sub>) δ: 8.60–8.57 (m, 1H), 8.44–8.42 (m, 1H), 7.85–7.83 (m, 1H), 7.54–7.52 (m, 2H), 7.44–7.38 (m, 5H), 7.15–7.06 (m, 4H), 6.95–6.93 (m, 2H), 6.71–6.68 (m, 2H), 4.89 (d, *J* = 14.4 Hz, 1H), 4.27 (d, *J* = 14.4 Hz, 1H), 3.55 (d, *J* = 16.4 Hz, 1H), 2.97 (d, *J* = 16.4 Hz, 1H), 1.49 (s, 3H). <sup>13</sup>C NMR (100 MHz, CDCl<sub>3</sub>) δ: 173.4, 169.1, 149.9, 144.0, 141.9, 141.8, 136.8, 131.7, 131.2, 129.8,

128.4, 128.2, 128.1, 128.0, 127.5, 127.1, 126.3, 125.4, 125.2, 124.6, 123.3, 119.6, 115.7, 52.6, 47.3, 45.2, 29.5. HRMS (ESI) ( $[M+H]^+$ ) Calcd. For  $[C_{31}H_{26}N_3O_2]^+$ : 472.2020, Found: 472.2024.

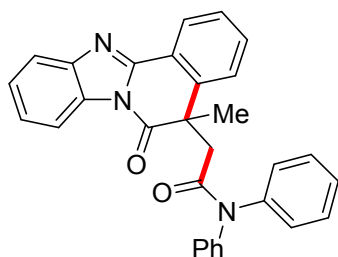

**2-(5-Methyl-6-oxo-5,6-dihydrobenzo[4,5]imidazo[2,1-*a*]isoquinolin-5-yl)-*N,N*-diphenylacetamide (3ae):** White solid; mp: 180.3–182.4 °C;  $^1H$  NMR (400 MHz,  $CDCl_3$ )  $\delta$ : 8.55 (dd,  $J_1 = 1.6$  Hz,  $J_2 = 8.0$  Hz, 1H), 8.39–8.36 (m, 1H), 7.81–7.79 (m, 1H), 7.58–7.21 (m, 11H), 7.10–7.00 (m, 3H), 6.80 (d,  $J = 8.0$  Hz, 2H), 3.71 (d,  $J = 16.8$  Hz, 1H), 3.15 (d,  $J = 16.8$  Hz, 1H), 1.50 (s, 3H).  $^{13}C$  NMR (100 MHz,  $CDCl_3$ )  $\delta$ : 173.1, 169.3, 149.8, 143.9, 141.8, 131.7, 131.2, 130.1, 128.7, 128.3, 127.5, 126.3, 126.1, 125.9, 125.3, 125.1, 124.3, 123.3, 119.5, 115.5, 47.4, 45.8, 29.6. HRMS (ESI) ( $[M+H]^+$ ) Calcd. For  $[C_{30}H_{24}N_3O_2]^+$ : 458.1863, Found: 458.1861.

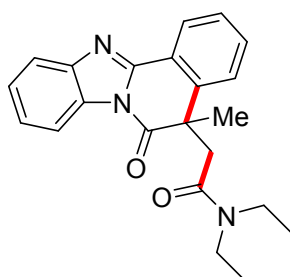

***N,N*-Diethyl-2-(5-methyl-6-oxo-5,6-dihydrobenzo[4,5]imidazo[2,1-*a*]isoquinolin-5-yl)acetamide (3af):** White solid; mp: 173.8–176.4 °C; <sup>1</sup>H NMR (400 MHz, CDCl<sub>3</sub>) δ: 8.51 (dd, *J*<sub>1</sub> = 1.6 Hz, *J*<sub>2</sub> = 7.6 Hz, 1H), 8.38–8.35 (m, 1H), 7.83–7.80 (m, 1H), 7.51–7.36 (m, 4H), 7.31–7.27 (m, 1H), 3.68 (d, *J* = 16.8 Hz, 1H), 3.36–3.29 (m, 3H), 3.13–3.07 (m, 2H), 1.61 (s, 3H), 1.22 (t, *J* = 7.2 Hz, 3H), 0.83 (t, *J* = 7.2 Hz, 3H). <sup>13</sup>C NMR (100 MHz, CDCl<sub>3</sub>) δ: 173.4, 167.9, 150.0, 144.0, 142.5, 131.7, 131.2, 127.2, 126.3, 125.3, 125.0, 124.1, 123.0, 119.5, 115.6, 46.9, 43.8, 41.8, 39.9, 29.9, 14.3, 12.8. HRMS (ESI) ([M+H]<sup>+</sup>) Calcd. For [C<sub>22</sub>H<sub>24</sub>N<sub>3</sub>O<sub>2</sub>]<sup>+</sup>: 362.1863, Found: 362.1865.

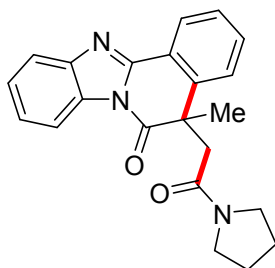

***N,N*-Diethyl-2-(5-methyl-6-oxo-5,6-dihydrobenzo[4,5]imidazo[2,1-*a*]isoquinolin-5-yl)acetamide (3ag):** White solid; mp: 149.5–152.0 °C; <sup>1</sup>H NMR (400 MHz, CDCl<sub>3</sub>) δ: 8.51 (dd, *J*<sub>1</sub> = 1.6 Hz, *J*<sub>2</sub> = 7.6 Hz, 1H), 8.37–8.35 (m, 1H), 7.83–7.81 (m, 1H), 7.52–7.31 (m, 5H), 3.63 (d, *J* = 16.8 Hz, 1H), 3.49–3.37 (m, 2H), 3.27–3.19 (m, 2H), 3.14–3.07 (m, 1H), 1.90 (p, *J* = 6.8 Hz, 2H), 1.78–1.67 (m, 2H), 1.62 (s, 3H). <sup>13</sup>C NMR (100 MHz, CDCl<sub>3</sub>) δ: 173.5, 167.2, 150.0, 144.0, 142.3, 131.6, 131.3, 127.2, 126.3, 125.3, 125.0, 124.4, 123.0, 119.5, 115.6, 46.5, 46.4, 45.38, 45.35,

29.9, 25.9, 24.1. HRMS (ESI) ( $[M+H]^+$ ) Calcd. For  $[C_{22}H_{22}N_3O_2]^+$ :  
360.1707, Found: 360.1708.

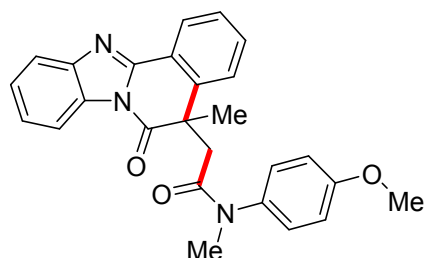

***N*-(4-Methoxyphenyl)-*N*-methyl-2-(5-methyl-6-oxo-5,6-dihydrobenzo[4,5]imidazo[2,1-*a*]isoquinolin-5-yl)acetamide (3ah):**

White solid; mp: 165.0–168.4 °C;  $^1H$  NMR (400 MHz,  $CDCl_3$ )  $\delta$  8.52 (dd,  $J_1 = 1.6$  Hz,  $J_2 = 7.6$  Hz, 1H), 8.41–8.39 (m, 1H), 7.84–7.82 (m, 1H), 7.53–7.39 (m, 4H), 7.16–7.11 (m, 3H), 7.01–6.99 (m, 2H), 3.86 (s, 3H), 3.47 (d,  $J = 16.8$  Hz, 1H), 3.01 (d,  $J = 16.8$  Hz, 1H), 2.95 (s, 3H), 1.45 (s, 3H).  $^{13}C$  NMR (100 MHz,  $CDCl_3$ )  $\delta$ : 173.6, 169.4, 159.3, 150.0, 144.1, 142.2, 136.2, 131.8, 131.4, 128.4, 127.5, 126.4, 125.5, 125.2, 124.5, 123.2, 119.7, 115.7, 115.3, 55.6, 47.1, 45.0, 37.3, 29.9. HRMS (ESI) ( $[M+H]^+$ ) Calcd. For  $[C_{26}H_{24}N_3O_3]^+$ : 426.1812, Found: 426.1811.

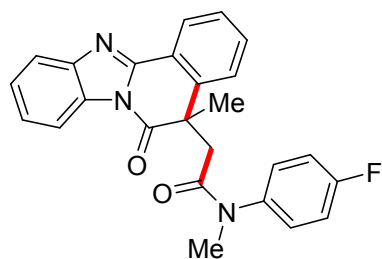

***N*-(4-Fluorophenyl)-*N*-methyl-2-(5-methyl-6-oxo-5,6-dihydrobenzo[4,5]imidazo[2,1-*a*]isoquinolin-5-yl)acetamide (3ai):**

White solid; mp: 195.5–196.3 °C; <sup>1</sup>H NMR (400 MHz, CDCl<sub>3</sub>) δ: 8.52 (dd, *J*<sub>1</sub> = 1.6 Hz, *J*<sub>2</sub> = 8.0 Hz, 1H), 8.40–8.38 (m, 1H), 7.84–7.82 (m, 1H), 7.53–7.37 (m, 4H), 7.19 (d, *J* = 6.8 Hz, 4H), 7.13 (d, *J* = 7.6 Hz, 1H), 3.46 (d, *J* = 16.8 Hz, 1H), 2.99–2.95 (m, 4H), 1.47 (s, 3H). <sup>13</sup>C NMR (100 MHz, CDCl<sub>3</sub>) δ: 173.3, 168.9, 163.4 (*J* = 247.0 Hz), 149.8, 143.9, 141.9, 139.3 (*J* = 3.5 Hz), 131.6, 131.3, 129.0 (*J* = 8.5 Hz), 127.4, 126.3, 125.4, 125.1, 124.2, 123.0, 119.5, 117.0 (*J* = 22.6 Hz), 115.5, 46.9, 44.9, 37.1, 29.7. <sup>19</sup>F NMR (377 MHz, CDCl<sub>3</sub>) δ: –112.38. HRMS (ESI) ([*M*+*H*]<sup>+</sup>) Calcd. For [C<sub>25</sub>H<sub>21</sub>FN<sub>3</sub>O<sub>2</sub>]<sup>+</sup>: 414.1612, Found: 414.1614.

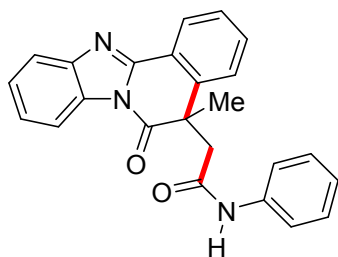

**2-(5-Methyl-6-oxo-5,6-dihydrobenzo[4,5]imidazo[2,1-*a*]isoquinolin-5-yl)-*N*-phenylacetamide (3aj):** White solid; mp: 165.5–165.9 °C; <sup>1</sup>H NMR (400 MHz, DMSO-*d*<sub>6</sub>) δ: 10.11 (s, 1H), 8.39 (d, *J* = 7.6 Hz, 1H), 8.33–8.30 (m, 1H), 7.88–7.86 (m, 1H), 7.73 (d, *J* = 7.6 Hz, 1H), 7.65–7.61 (m, 1H), 7.53–7.44 (m, 3H), 7.30 (d, *J* = 8.0 Hz, 2H), 7.17–7.13 (m, 2H), 6.94 (t, *J* = 7.2 Hz, 1H), 3.68 (d, *J* = 16.8 Hz, 1H), 3.55 (d, *J* = 16.8 Hz, 1H), 1.66 (s, 3H). <sup>13</sup>C NMR (100 MHz, DMSO-*d*<sub>6</sub>) δ:

173.2, 168.0, 149.9, 143.7, 142.1, 138.4, 131.8, 131.3, 128.6, 127.5, 125.9, 125.5, 125.20, 125.16, 123.3, 122.4, 119.6, 118.9, 115.1, 46.8, 46.2, 29.0. HRMS (ESI) ( $[M+H]^+$ ) Calcd. For  $[C_{24}H_{20}N_3O_2]^+$ : 382.1550, Found: 382.1549.

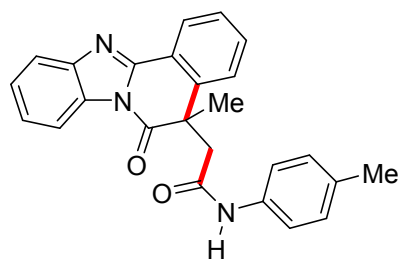

**2-(5-Methyl-6-oxo-5,6-dihydrobenzo[4,5]imidazo[2,1-a]isoquinolin-5-yl)-N-(p-tolyl)acetamide (3ak):** White solid; mp: 204.2–205.8 °C;  $^1H$  NMR (400 MHz,  $CDCl_3$ )  $\delta$ : 8.57 (s, 1H), 8.43–8.40 (m, 2H), 7.77–7.75 (m, 1H), 7.42–7.33 (m, 4H), 7.10 (d,  $J = 7.6$  Hz, 1H), 6.98 (d,  $J = 8.4$  Hz, 2H), 6.78 (d,  $J = 8.0$  Hz, 2H), 3.56 (d,  $J = 16.4$  Hz, 1H), 2.98 (d,  $J = 16.4$  Hz, 1H), 2.14 (s, 3H), 1.43 (s, 3H).  $^{13}C$  NMR (100 MHz,  $CDCl_3$ )  $\delta$ : 173.0, 167.6, 149.9, 143.6, 141.7, 134.8, 133.6, 131.7, 131.5, 129.1, 127.6, 126.0, 125.6, 125.4, 124.9, 122.5, 119.7, 119.4, 115.7, 46.5, 46.0, 29.8, 20.7. HRMS (ESI) ( $[M+H]^+$ ) Calcd. For  $[C_{25}H_{22}N_3O_2]^+$ : 396.1707, Found: 396.1704.



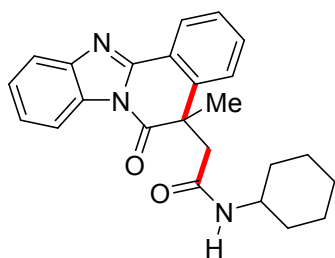

***N*-Cyclohexyl-2-(5-methyl-6-oxo-5,6-dihydrobenzo[4,5]imidazo[2,1-*a*]isoquinolin-5-yl)acetamide (3a):**

White solid; mp: 226.7–228.3 °C; <sup>1</sup>H NMR (400 MHz, CDCl<sub>3</sub>) δ: 8.49 (dd, *J*<sub>1</sub> = 1.6 Hz, *J*<sub>2</sub> = 7.2 Hz, 1H), 8.42–8.40 (m, 1H), 7.83–7.81 (m, 1H), 7.51–7.39 (m, 4H), 7.34 (d, *J* = 7.6 Hz, 1H), 5.84 (d, *J* = 8.4 Hz, 1H), 3.57 (d, *J* = 15.6 Hz, 1H), 3.42–3.33 (m, 1H), 2.92 (d, *J* = 15.6 Hz, 1H), 1.69–1.40 (m, 8H), 1.26–0.76 (m, 6H). <sup>13</sup>C NMR (100 MHz, CDCl<sub>3</sub>) δ: 173.0, 167.8, 149.8, 143.9, 141.5, 131.6, 131.3, 127.5, 126.1, 125.5, 125.2, 125.0, 122.8, 119.5, 115.7, 48.0, 46.8, 46.6, 32.75, 32.69, 29.5, 25.2, 24.62, 24.55. HRMS (ESI) ([M+H]<sup>+</sup>) Calcd. For [C<sub>24</sub>H<sub>26</sub>N<sub>3</sub>O<sub>2</sub>]: 388.2020, Found: 388.2027.

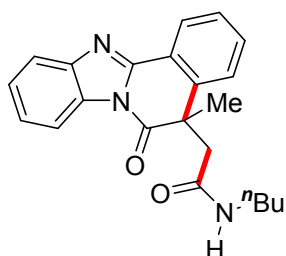

***N*-Butyl-2-(5-methyl-6-oxo-5,6-dihydrobenzo[4,5]imidazo[2,1-*a*]isoquinolin-5-yl)acetamide (3am):** White solid; mp: 154.1–155.9 °C;

$^1\text{H}$  NMR (400 MHz,  $\text{CDCl}_3$ )  $\delta$ : 8.48 (dd,  $J_1 = 1.6$  Hz,  $J_2 = 7.2$  Hz, 1H), 8.41–8.38 (m, 1H), 7.82–7.80 (m, 1H), 7.49–7.40 (m, 4H), 7.34 (dd,  $J_1 = 1.6$  Hz,  $J_2 = 7.6$  Hz, 1H), 5.92–5.89 (m, 1H), 3.58 (d,  $J = 15.6$  Hz, 1H), 2.97–2.86 (m, 3H), 1.59 (s, 3H), 1.18–1.11 (m, 2H), 1.07–1.00 (m, 2H), 0.71 (t,  $J = 7.2$  Hz, 3H).  $^{13}\text{C}$  NMR (100 MHz,  $\text{CDCl}_3$ )  $\delta$ : 173.1, 168.7, 149.8, 143.9, 141.4, 131.6, 131.4, 127.5, 126.1, 125.5, 125.3, 125.0, 122.9, 119.5, 115.7, 46.8, 46.4, 39.0, 31.2, 29.6, 19.6, 13.5. HRMS (ESI) ( $[\text{M}+\text{H}]^+$ ) Calcd. For  $[\text{C}_{22}\text{H}_{24}\text{N}_3\text{O}_2]^+$ : 362.1863, Found: 362.1872.

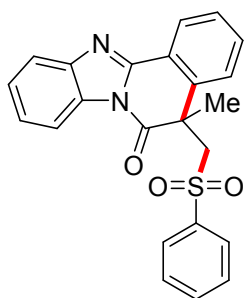

**5-Methyl-5-((phenylsulfonyl)methyl)benzo[4,5]imidazo[2,1-**

***a*]isoquinolin-6(5*H*)-one (5a):** White solid; mp: 186.8–189.9 °C;

$^1\text{H}$  NMR (400 MHz,  $\text{CDCl}_3$ )  $\delta$ : 8.50 (dd,  $J_1 = 1.6$  Hz,  $J_2 = 8.0$  Hz, 1H), 8.35–8.33 (m, 1H), 7.85–7.83 (m, 1H), 7.48–7.37 (m, 6H), 7.27–7.22 (m, 3H), 7.15 (d,  $J = 8.0$  Hz, 1H), 4.55 (d,  $J = 14.8$  Hz, 1H), 4.04 (d,  $J = 14.8$  Hz, 1H), 1.67 (s, 3H).  $^{13}\text{C}$  NMR (100 MHz,  $\text{CDCl}_3$ )  $\delta$ : 170.6, 149.2, 143.8, 139.6, 137.0, 133.3, 131.4, 131.2, 128.9, 128.4, 127.5, 126.6, 126.1, 126.0, 125.6, 122.8, 119.8, 115.7,

64.4, 46.8, 31.0. HRMS (ESI) ( $[M+Na]^+$ ) Calcd. For  $[C_{23}H_{18}N_2NaO_3S]^+$ : 425.0930, Found: 425.0937.

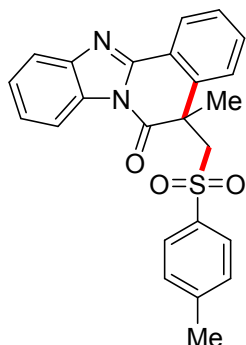

**5-Methyl-5-(tosylmethyl)benzo[4,5]imidazo[2,1-*a*]isoquinolin-6(5*H*)-one (5b):** White solid; mp: 188.7–189.8 °C;  $^1H$  NMR (400 MHz,  $CDCl_3$ )  $\delta$ : 8.51–8.48 (m, 1H), 8.26–8.23 (m, 1H), 7.83–7.81 (m, 1H), 7.49–7.35 (m, 4H), 7.30–7.26 (m, 4H), 6.99–6.97 (m, 2H), 4.54 (d,  $J = 14.8$  Hz, 1H), 3.99 (d,  $J = 14.8$  Hz, 1H), 2.14 (s, 3H), 1.67 (s, 3H).  $^{13}C$  NMR (100 MHz,  $CDCl_3$ )  $\delta$ : 170.4, 149.2, 144.8, 143.9, 137.1, 136.1, 131.4, 131.3, 129.5, 128.4, 127.9, 127.0, 126.1, 126.0, 125.6, 122.8, 119.8, 115.7, 64.4, 46.9, 31.5, 21.3. HRMS (ESI) ( $[M+Na]^+$ ) Calcd. For  $[C_{24}H_{20}N_2NaO_3S]^+$ : 439.1087, Found: 439.1089.

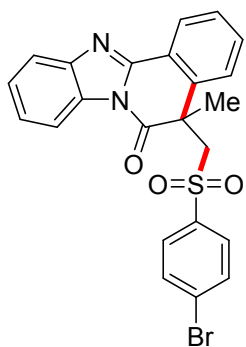

**5-(((4-Bromophenyl)sulfonyl)methyl)-5-methylbenzo[4,5]imidazo[2,1-*a*]isoquinolin-6(5*H*)-one (5c):** White solid; mp: 216.8–218.8 °C; <sup>1</sup>H NMR (400 MHz, CDCl<sub>3</sub>) δ: 8.51–8.49 (m, 1H), 8.31–8.29 (m, 1H), 7.85–7.83 (m, 1H), 7.49–7.43 (m, 3H), 7.39–7.35 (m, 2H), 7.32–7.23 (m, 3H), 7.16 (d, *J* = 7.6 Hz, 1H), 4.52 (d, *J* = 14.8 Hz, 1H), 4.00 (d, *J* = 14.8 Hz, 1H), 1.67 (s, 3H). <sup>13</sup>C NMR (100 MHz, CDCl<sub>3</sub>) δ: 170.4, 149.0, 143.8, 138.5, 136.9, 132.2, 131.34, 131.28, 129.1, 128.9, 128.4, 126.6, 126.2, 126.1, 125.9, 122.9, 119.9, 115.7, 64.5, 46.8, 31.1. HRMS (ESI) ([*M*+*H*]<sup>+</sup>) Calcd. For [C<sub>23</sub>H<sub>18</sub>BrN<sub>2</sub>O<sub>3</sub>S]<sup>+</sup>: 481.0216, Found: 481.0221.

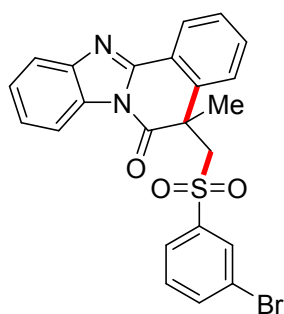

**5-(((3-Bromophenyl)sulfonyl)methyl)-5-methylbenzo[4,5]imidazo[2,1-*a*]isoquinolin-6(5*H*)-one (5d):** White solid; mp: 170.6–172.9 °C; <sup>1</sup>H NMR (400 MHz, CDCl<sub>3</sub>) δ: 8.52 (dd, *J*<sub>1</sub> = 1.2 Hz, *J*<sub>2</sub> = 8.0 Hz, 1H), 8.36–8.34 (m, 1H), 7.85–7.83 (m, 1H), 7.51–7.36 (m, 6H), 7.22–7.18 (m, 1H), 7.15–7.08 (m, 2H), 4.54 (d, *J* = 14.8 Hz, 1H), 4.03 (d, *J* = 14.8 Hz, 1H), 1.66 (s, 3H). <sup>13</sup>C NMR (100 MHz, CDCl<sub>3</sub>) δ: 170.4, 149.0, 143.8, 141.4, 136.6, 136.4, 131.4, 131.0, 130.44, 130.42, 128.7, 126.4, 126.1, 126.01, 125.96, 125.7, 122.91, 122.88, 119.8, 115.7,

64.6, 46.8, 30.8. HRMS (ESI) ( $[M+Na]^+$ ) Calcd. For  $[C_{23}H_{17}BrN_2NaO_3S]^+$ : 503.0035, Found: 503.0039.

## 6. $^1H$ and $^{13}C$ NMR spectra of the products

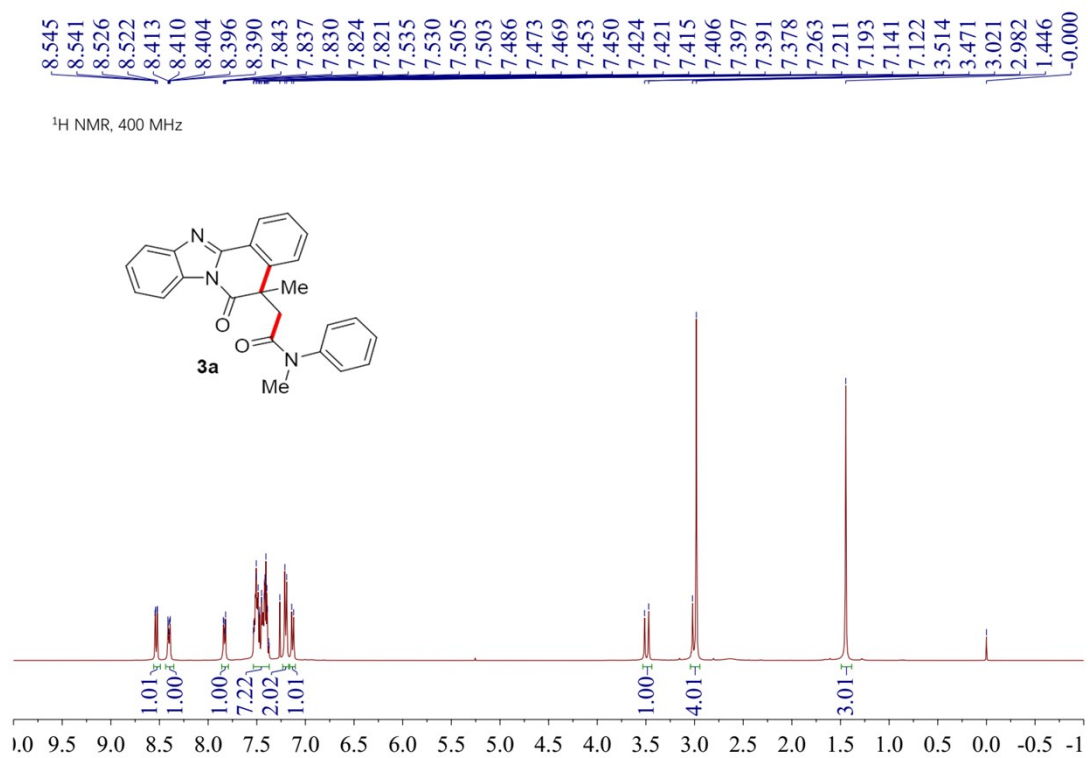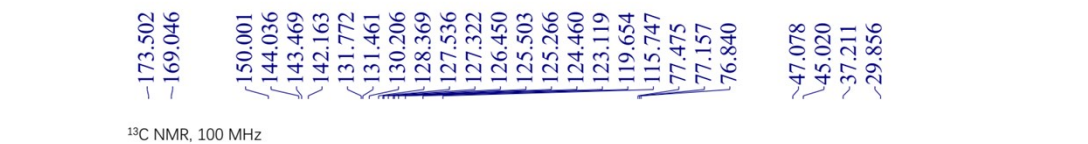

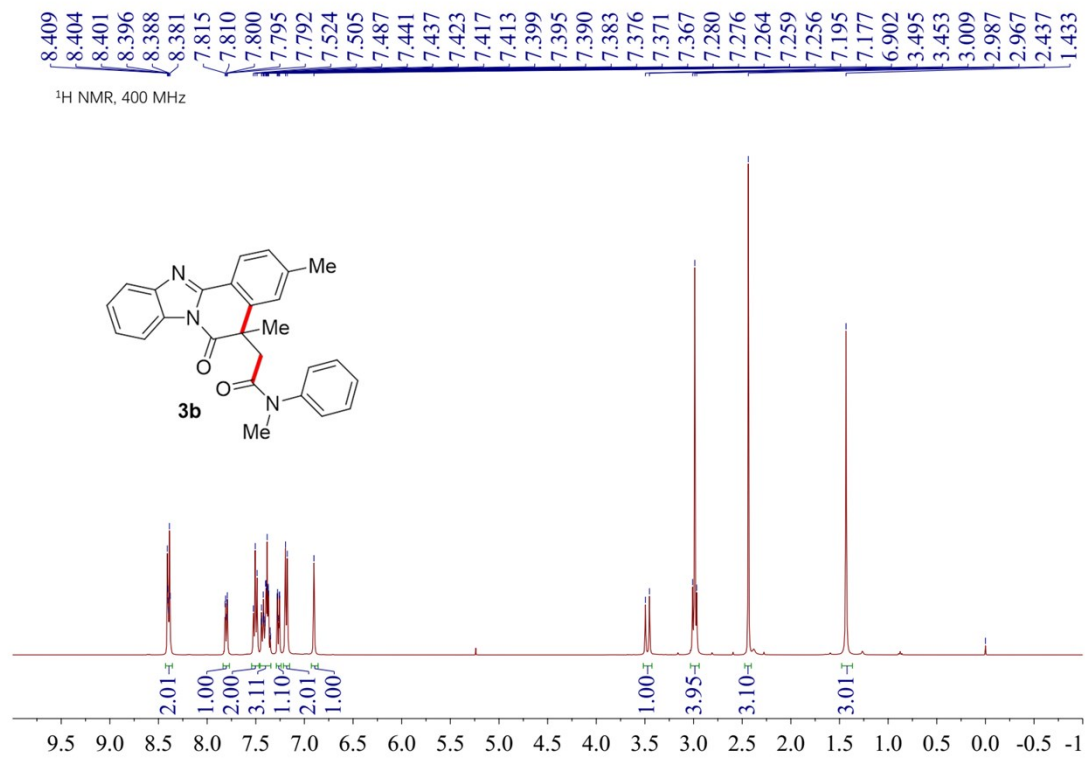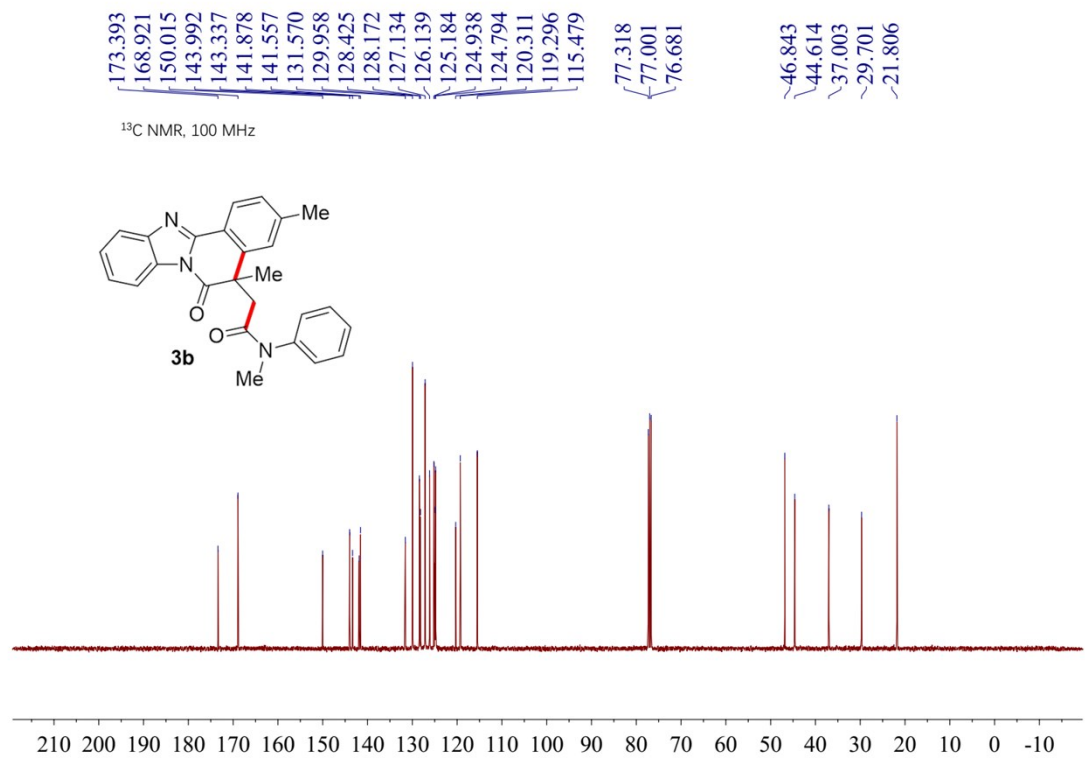

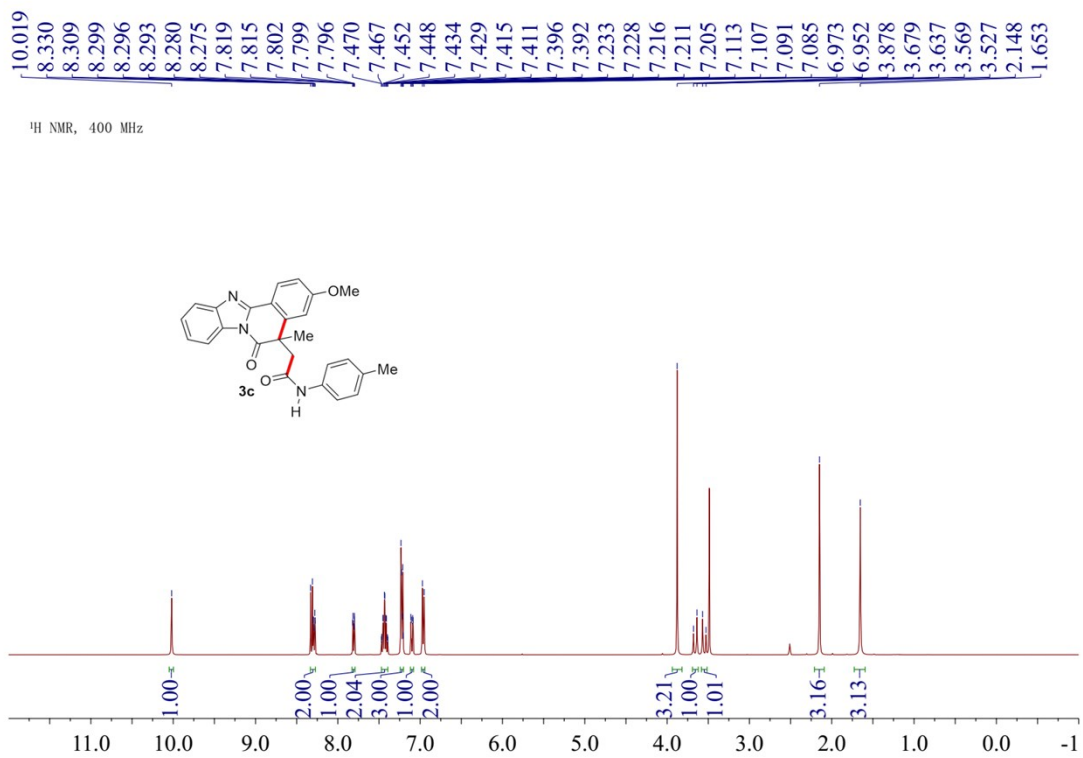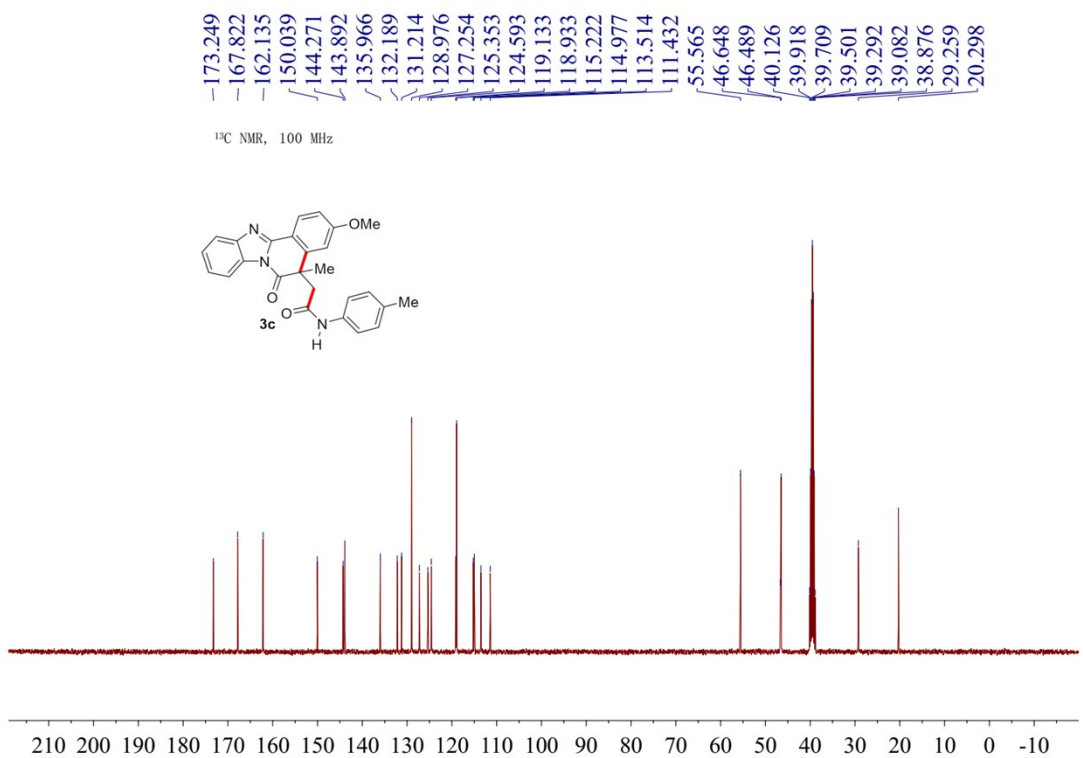

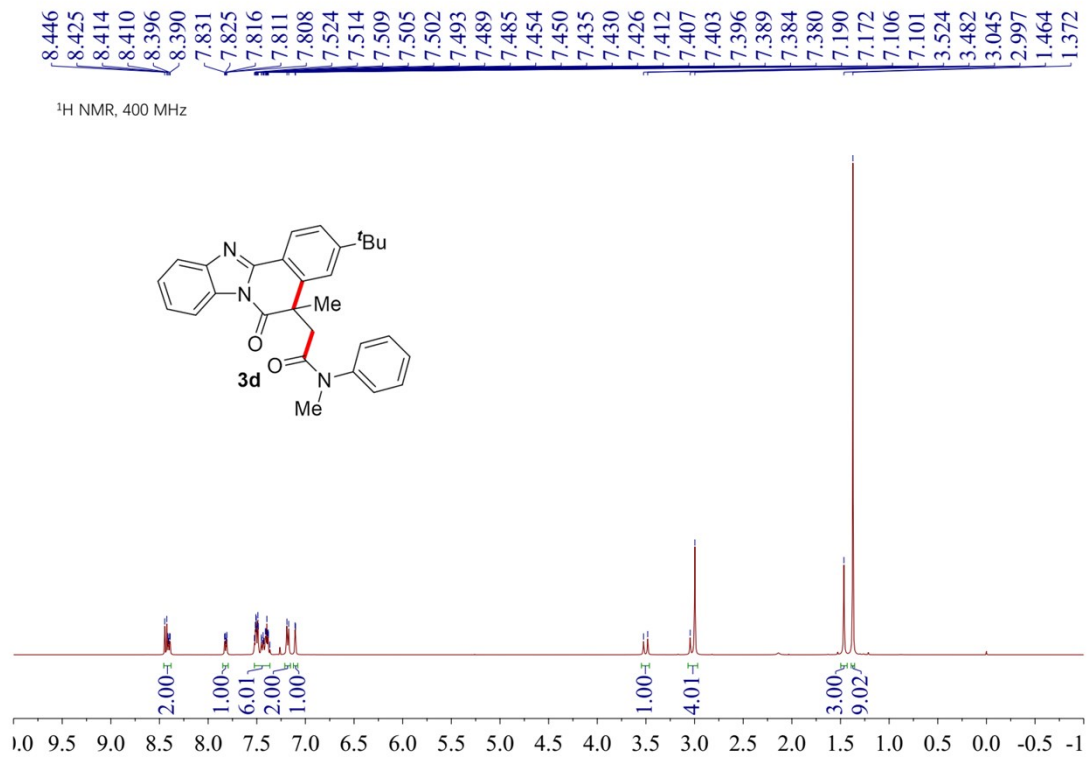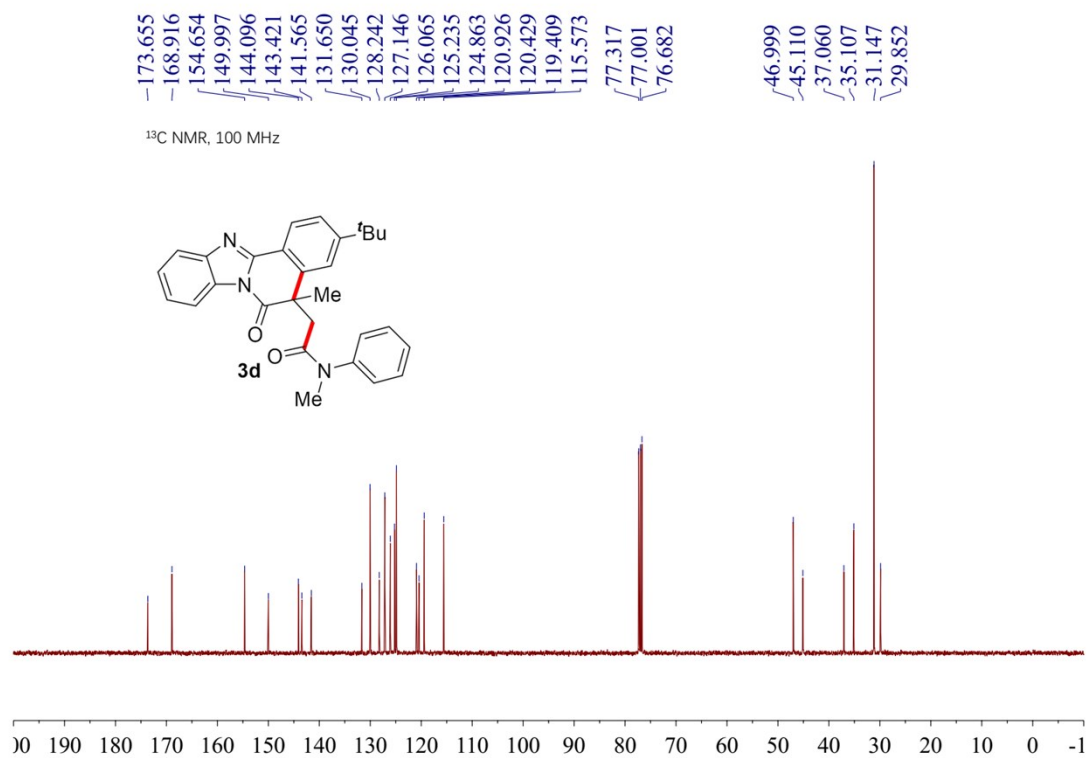



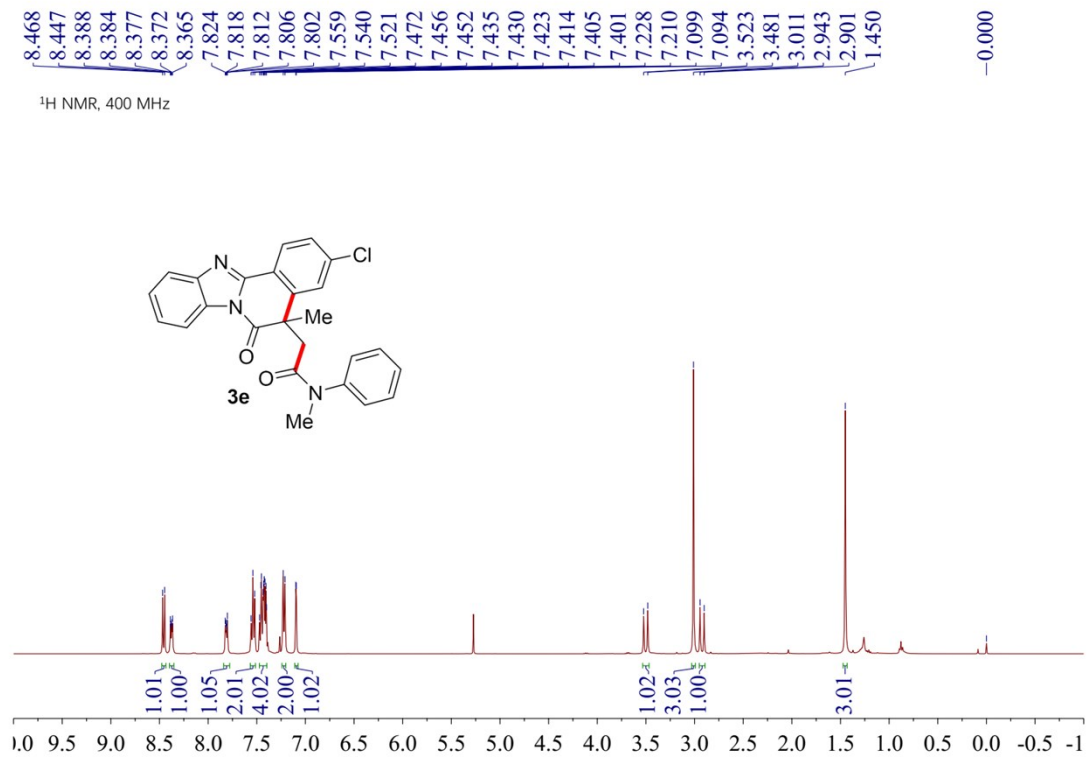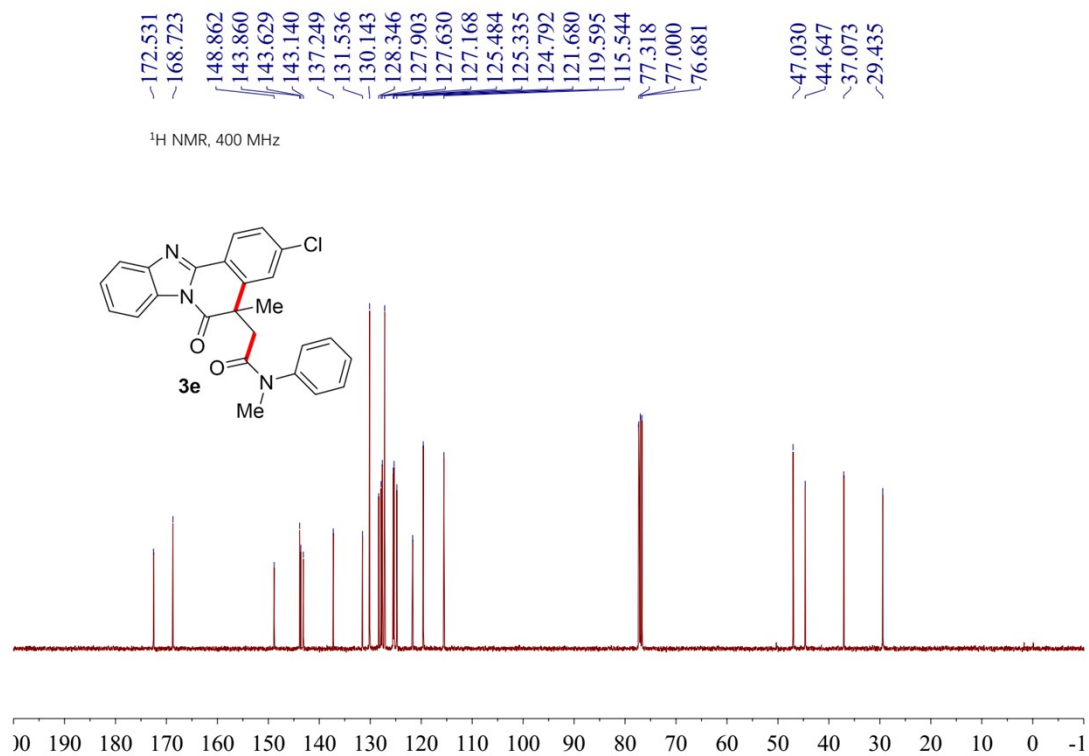

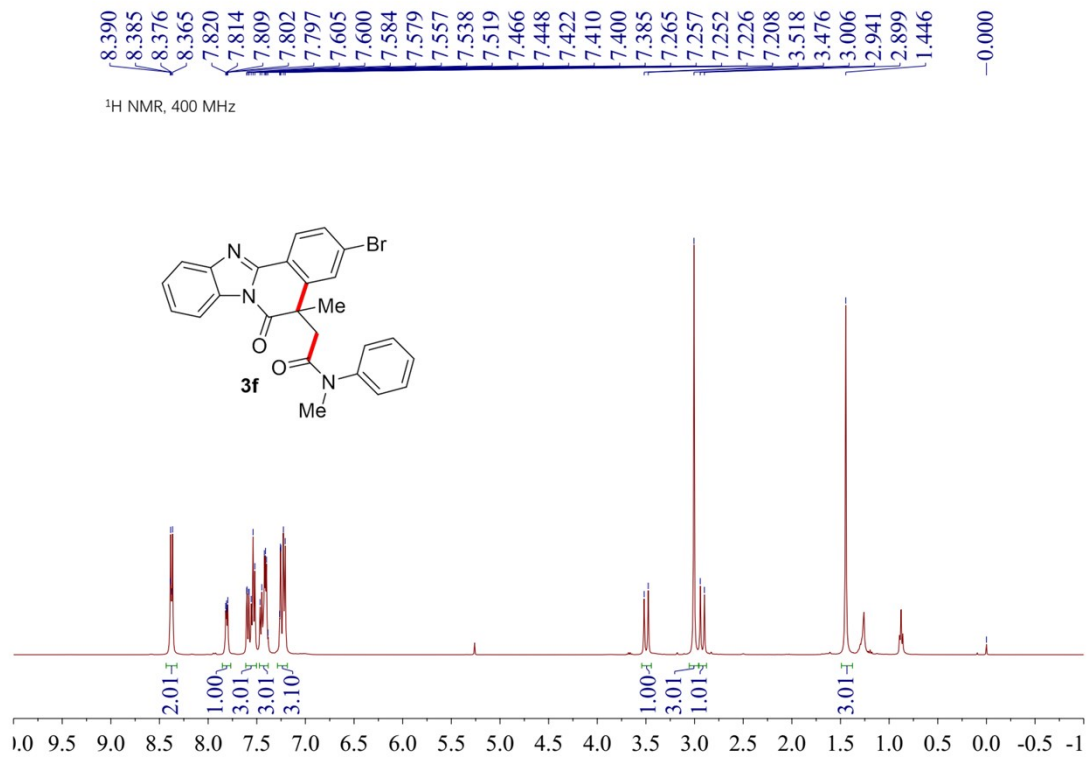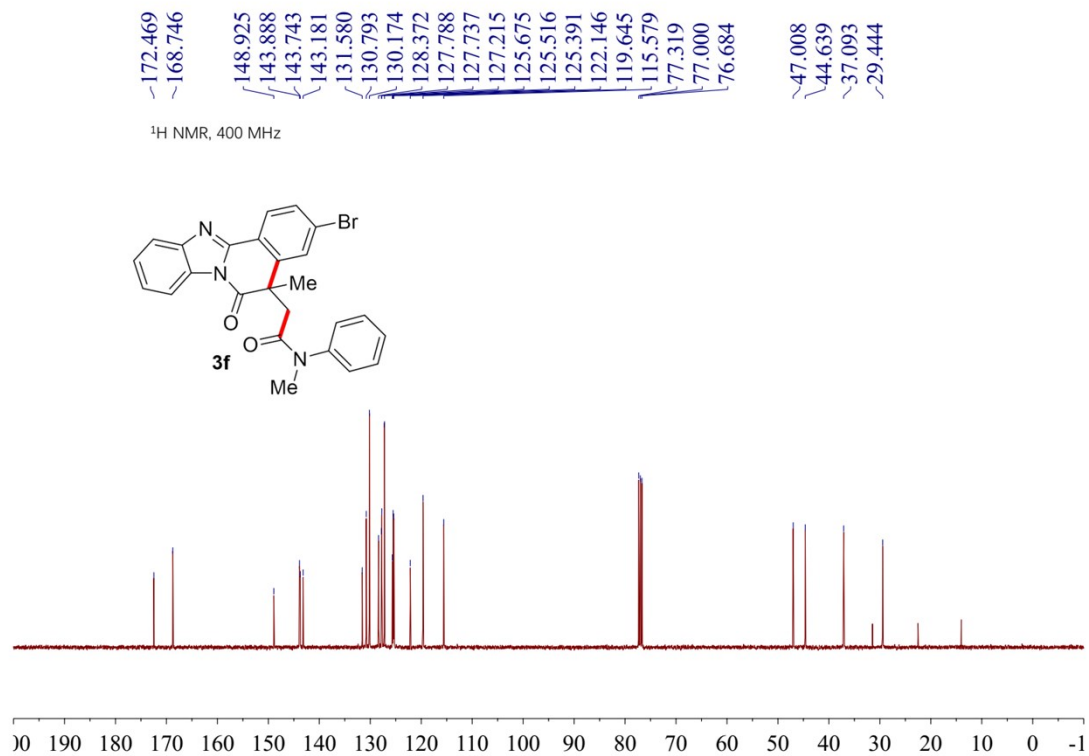

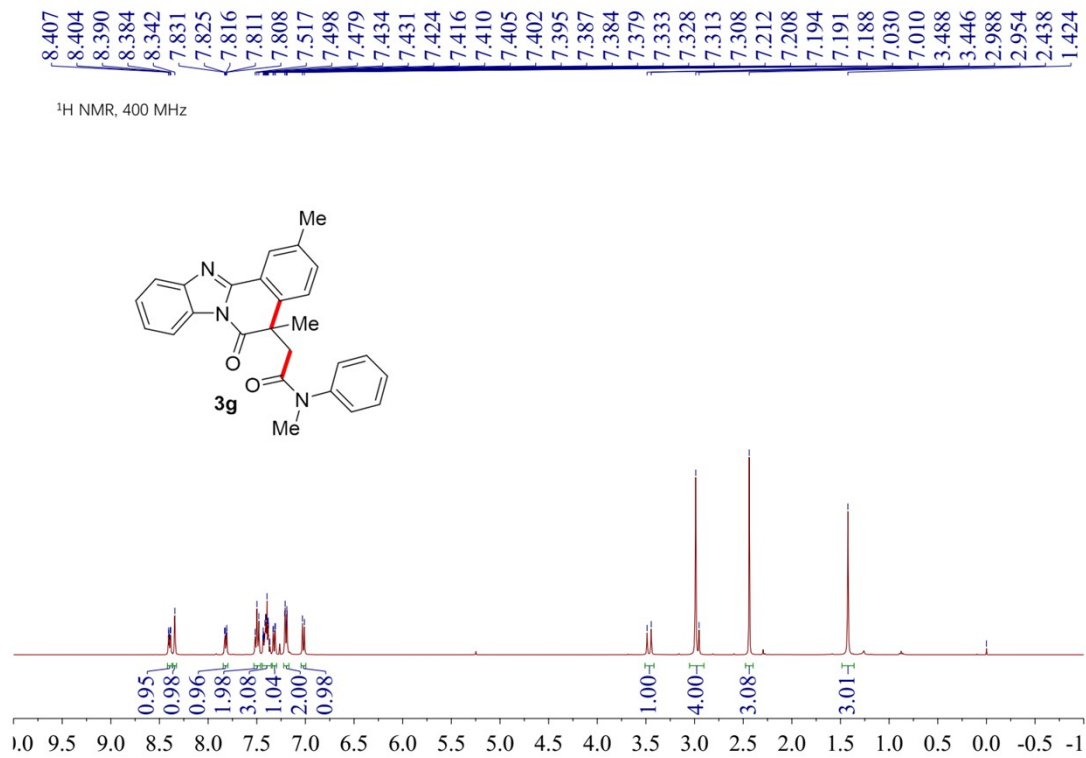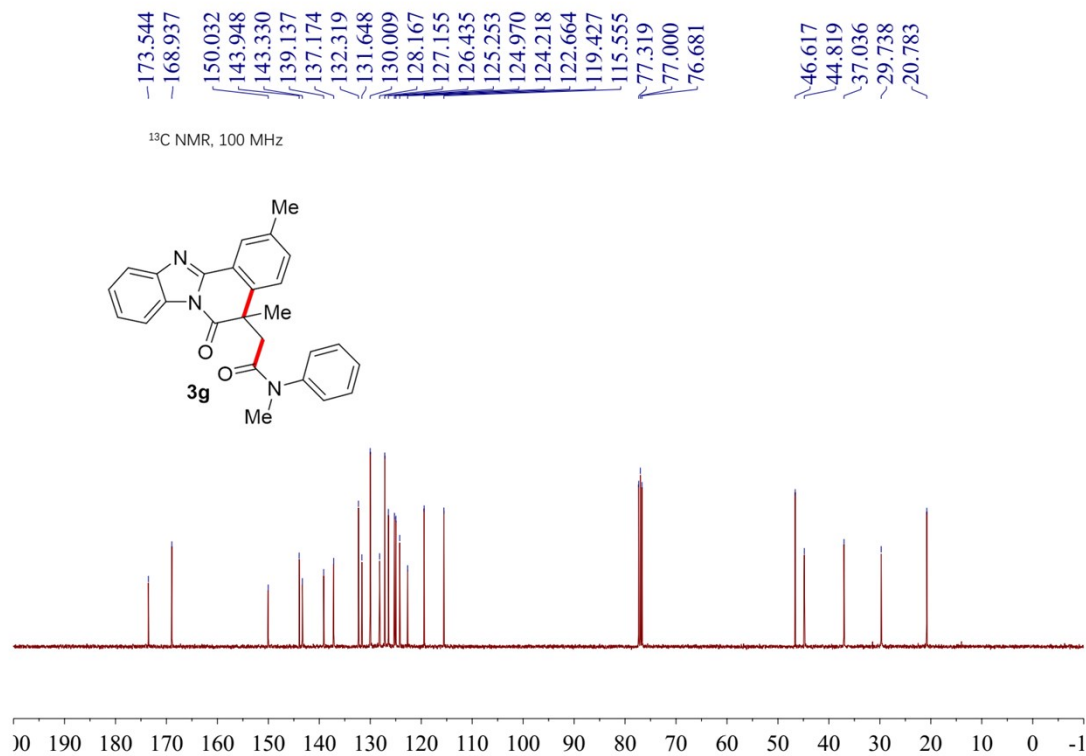

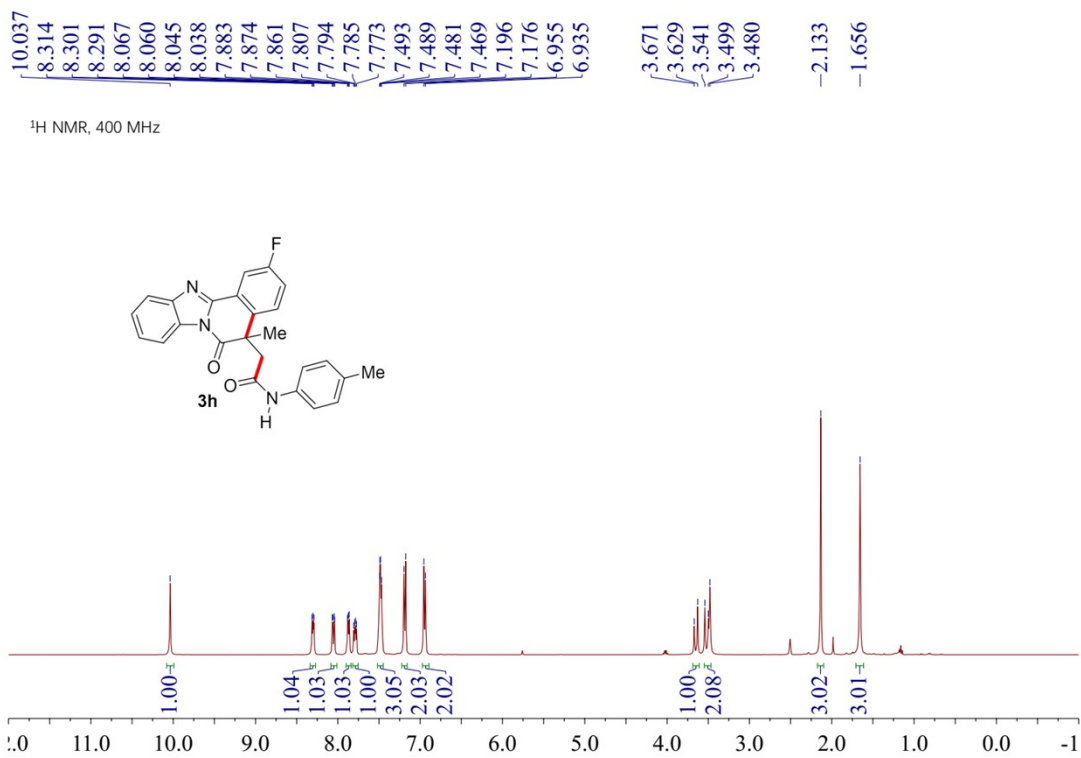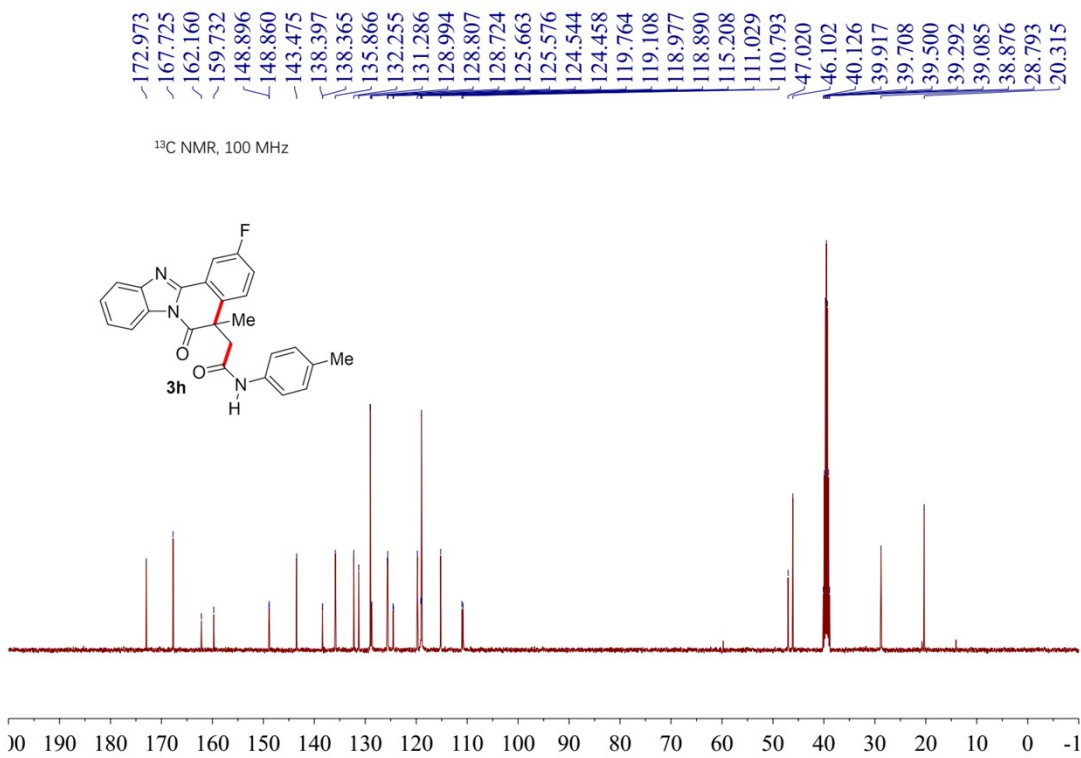

<sup>19</sup>F NMR, 377 MHz

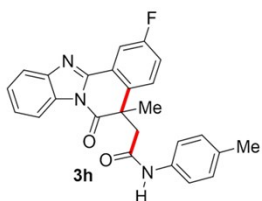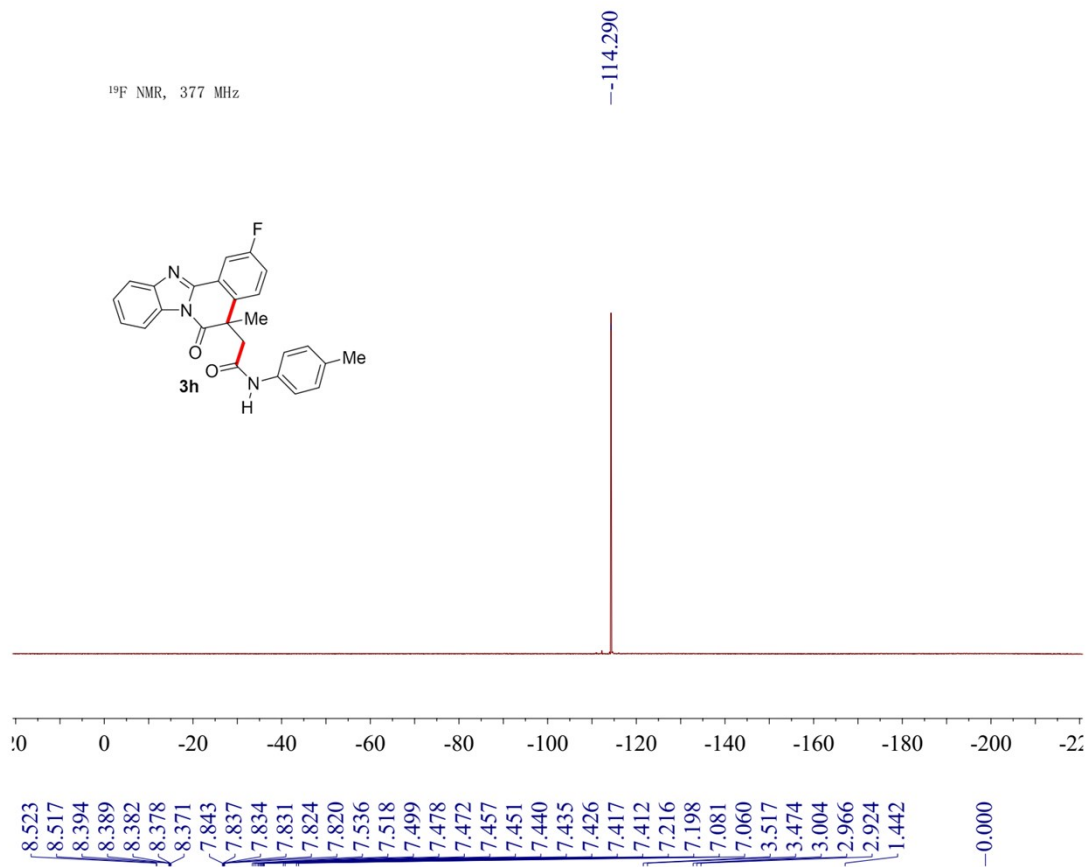

<sup>1</sup>H NMR, 400 MHz

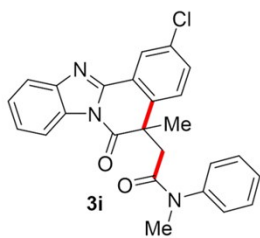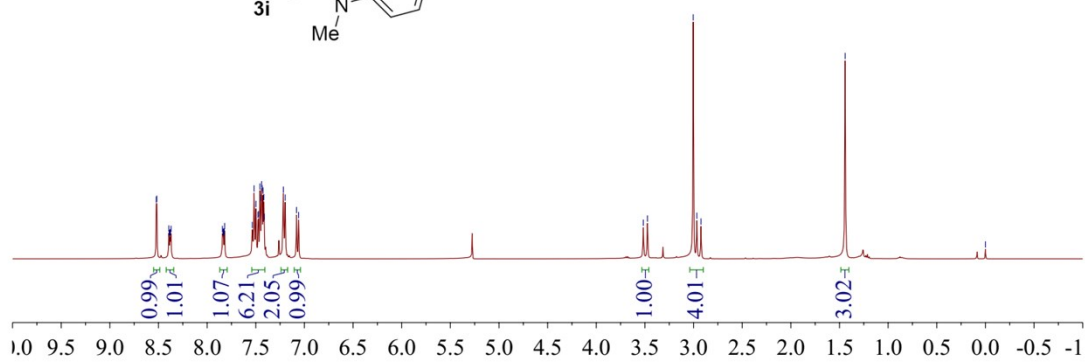

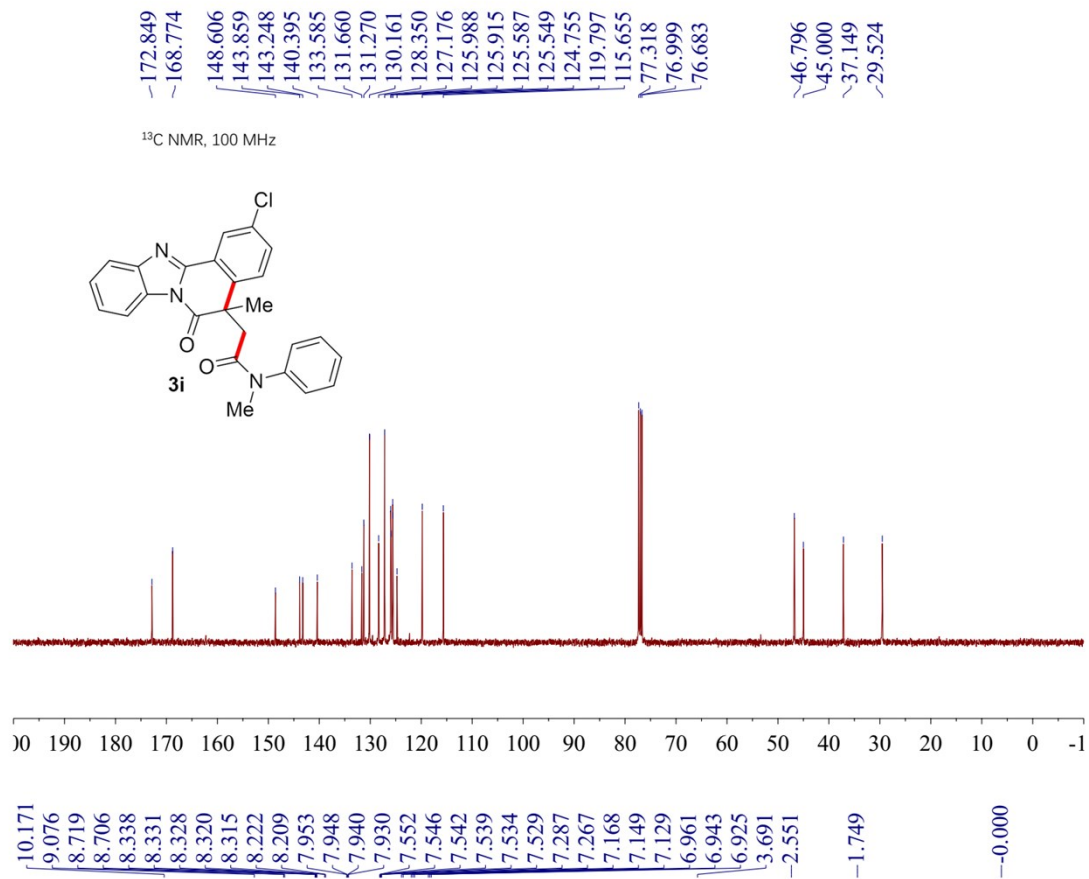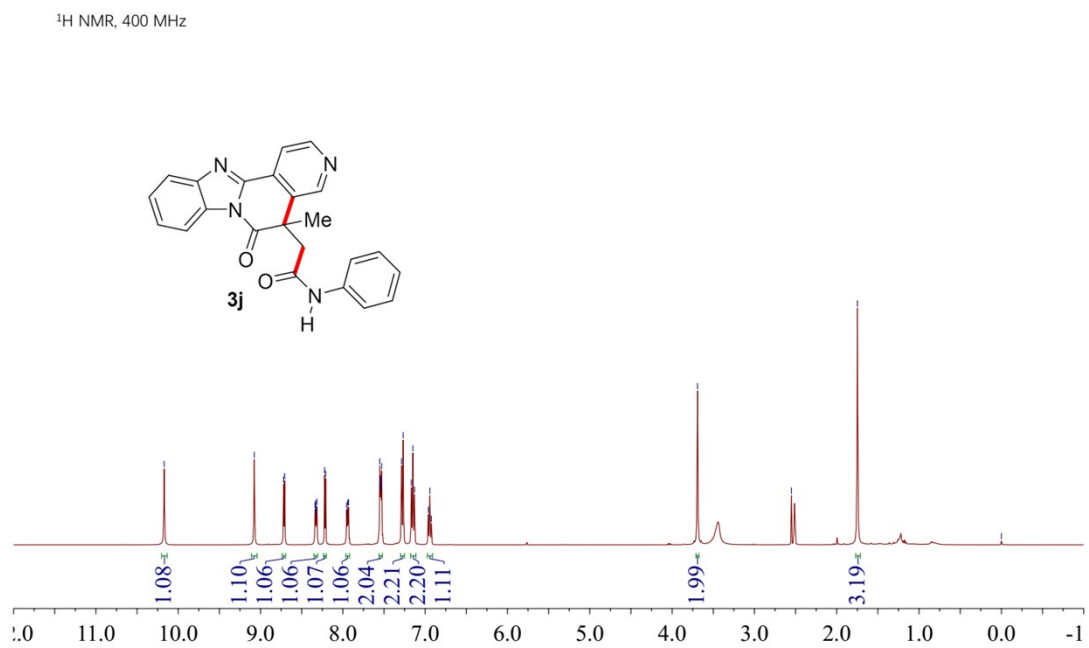

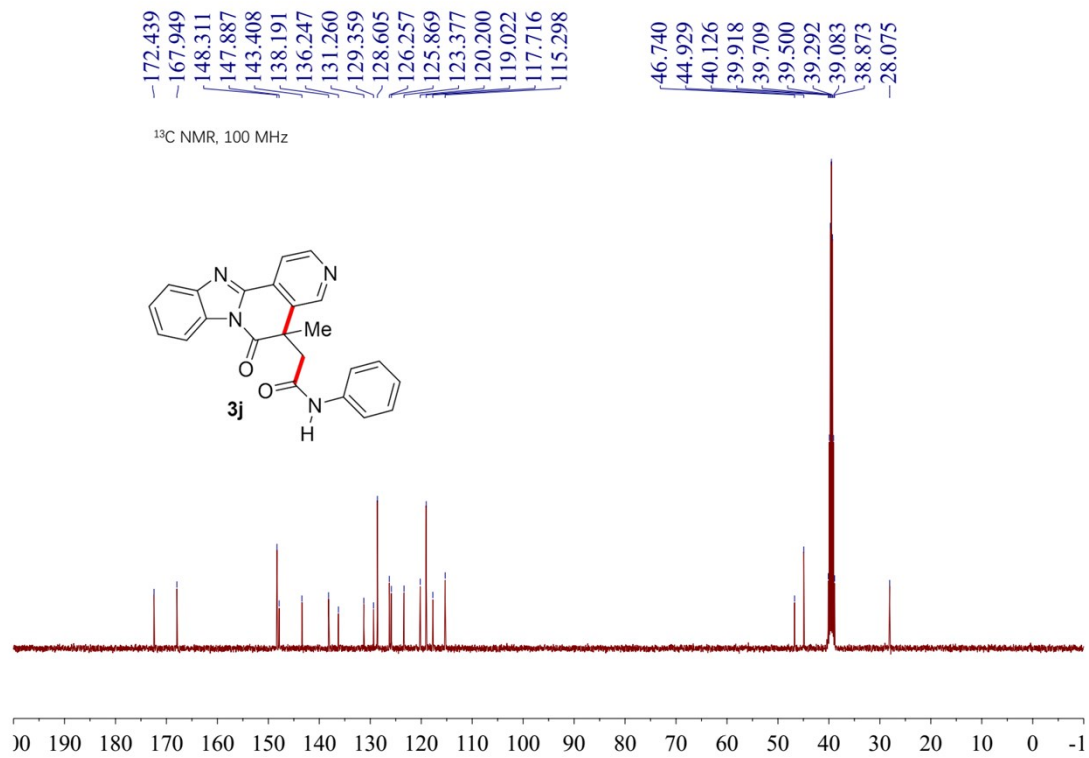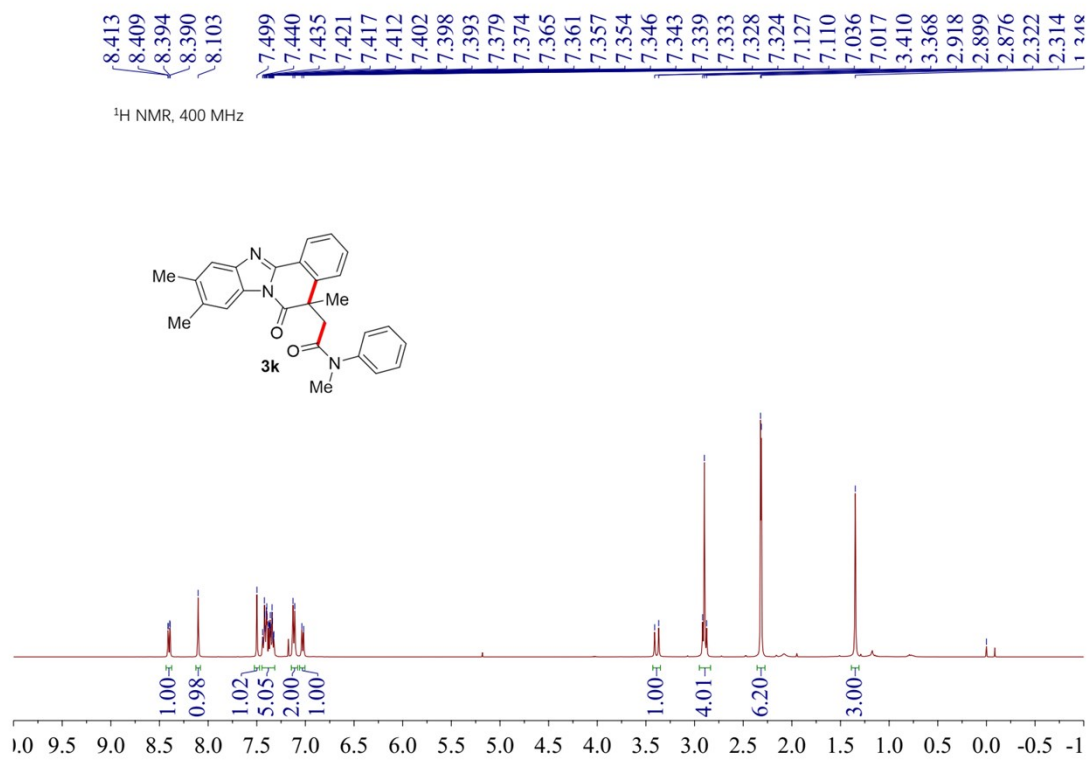

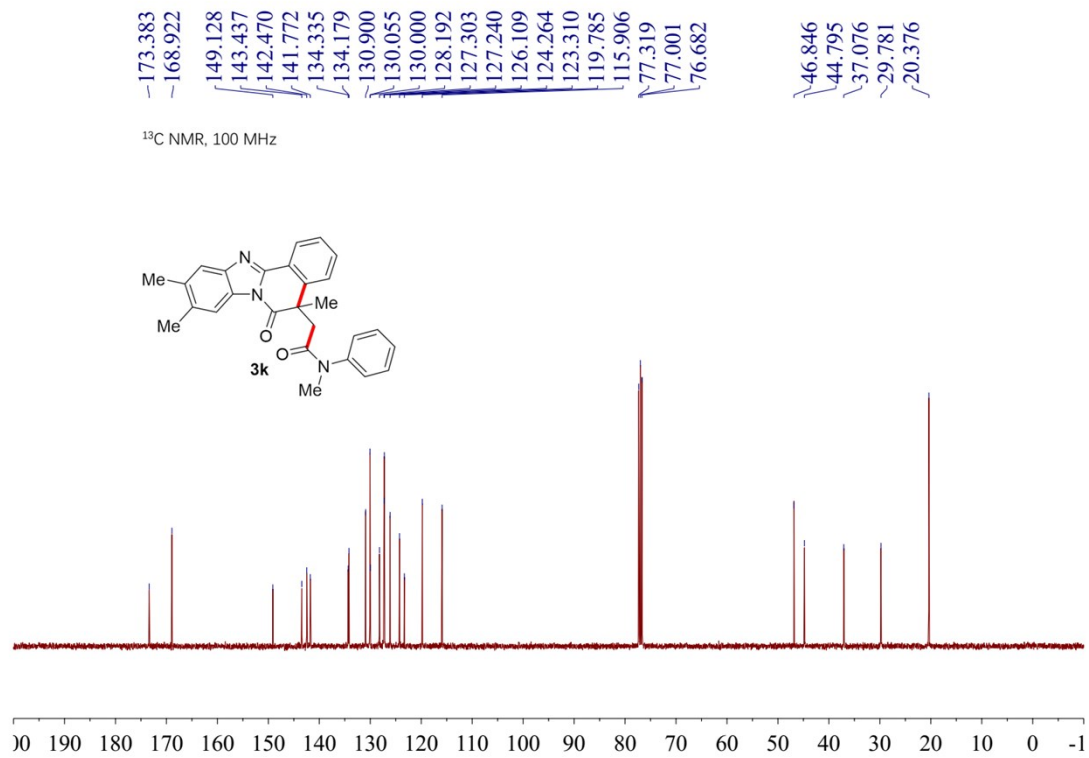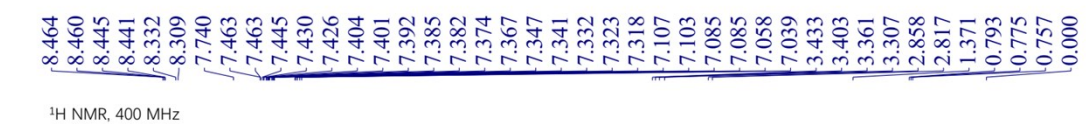



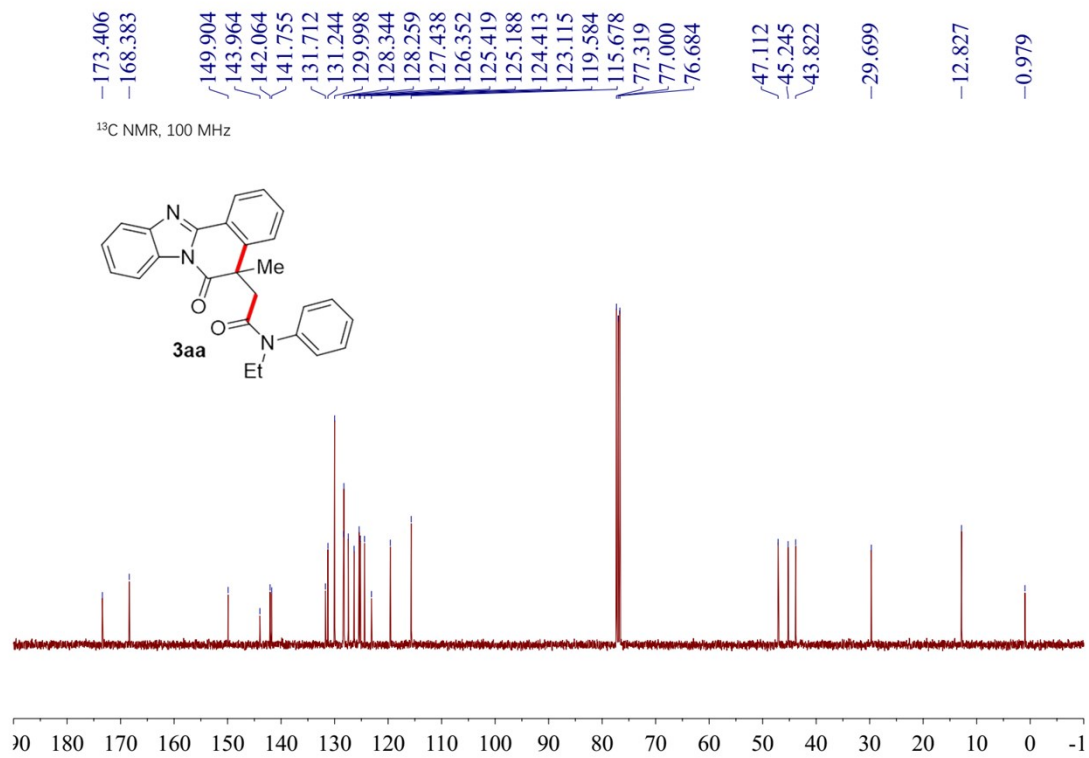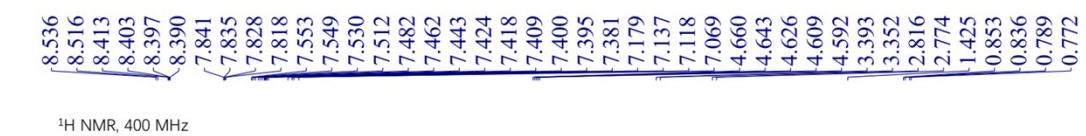

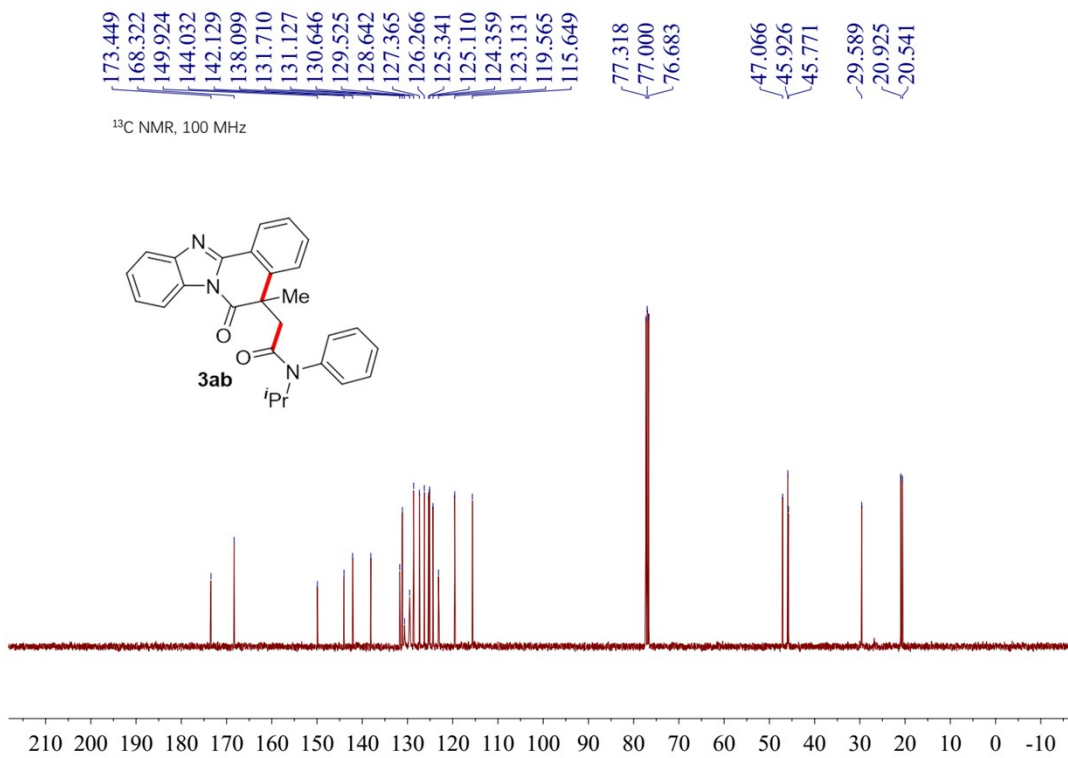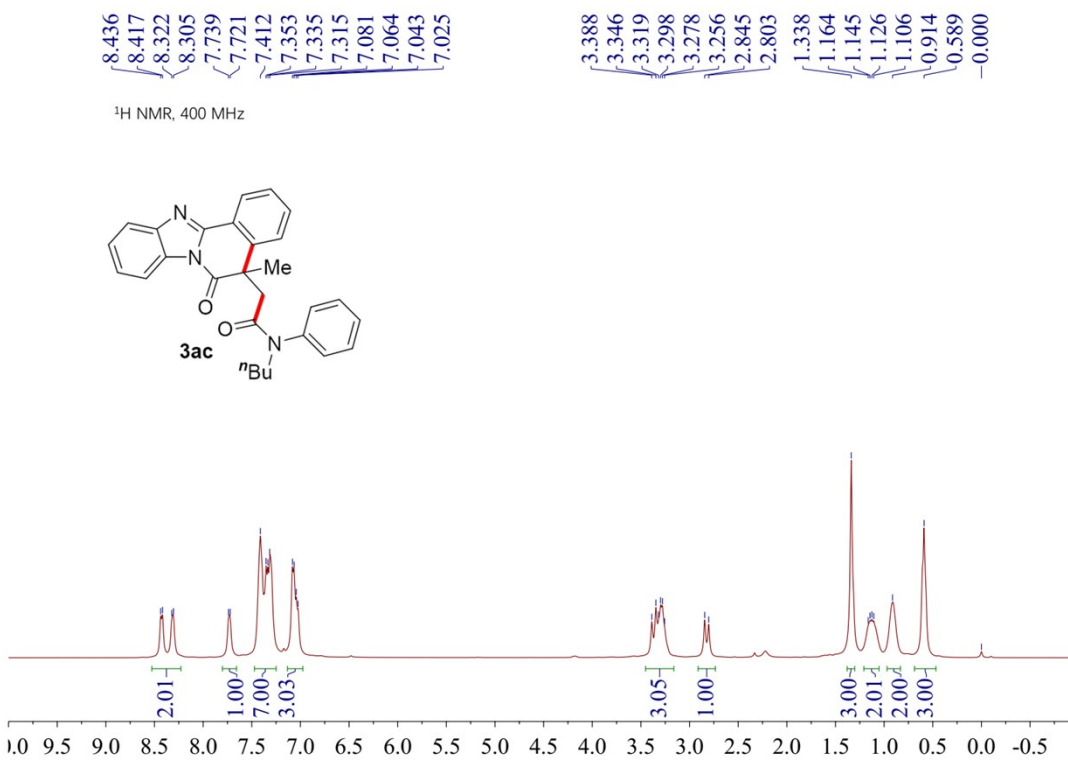

173.277  
168.438  
149.832  
143.943  
141.923  
141.892  
131.640  
131.124  
129.883  
128.206  
128.077  
127.294  
126.151  
125.251  
125.015  
124.323  
123.012  
119.459  
115.570

77.319  
77.001  
76.684

48.657  
47.019  
45.032

29.586  
29.398  
19.521  
13.540

<sup>13</sup>C NMR, 100 MHz

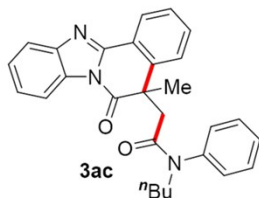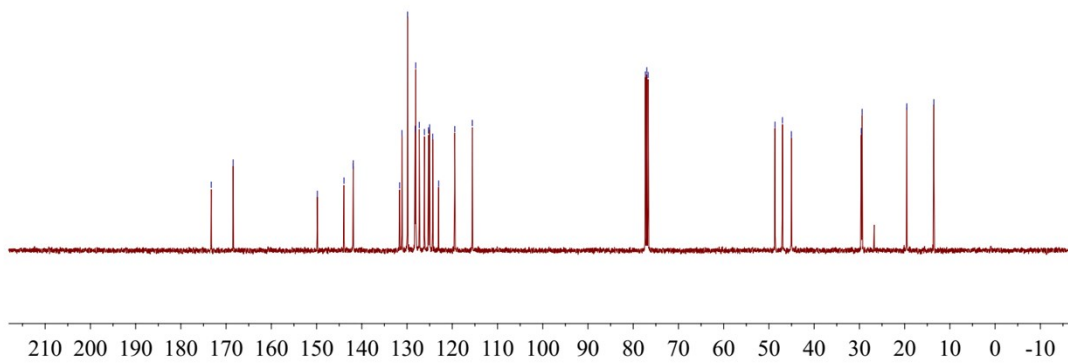

8.584  
8.572  
8.428  
7.841  
7.829  
7.538  
7.533  
7.526  
7.520  
7.515  
7.435  
7.430  
7.424  
7.417  
7.412  
7.399  
7.394  
7.386  
7.381  
7.143  
7.137  
7.122  
7.093  
7.074  
7.057  
6.949  
6.940  
6.931  
6.926  
6.706  
6.688  
6.684  
4.909  
4.873  
4.288  
4.252  
3.570  
3.529  
2.994  
2.953  
1.487

<sup>1</sup>H NMR, 400 MHz

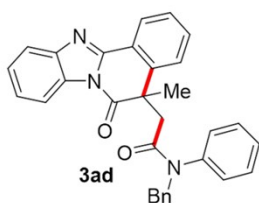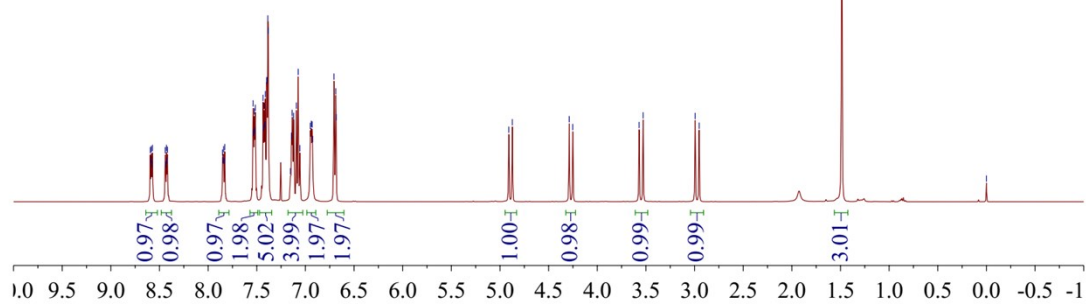

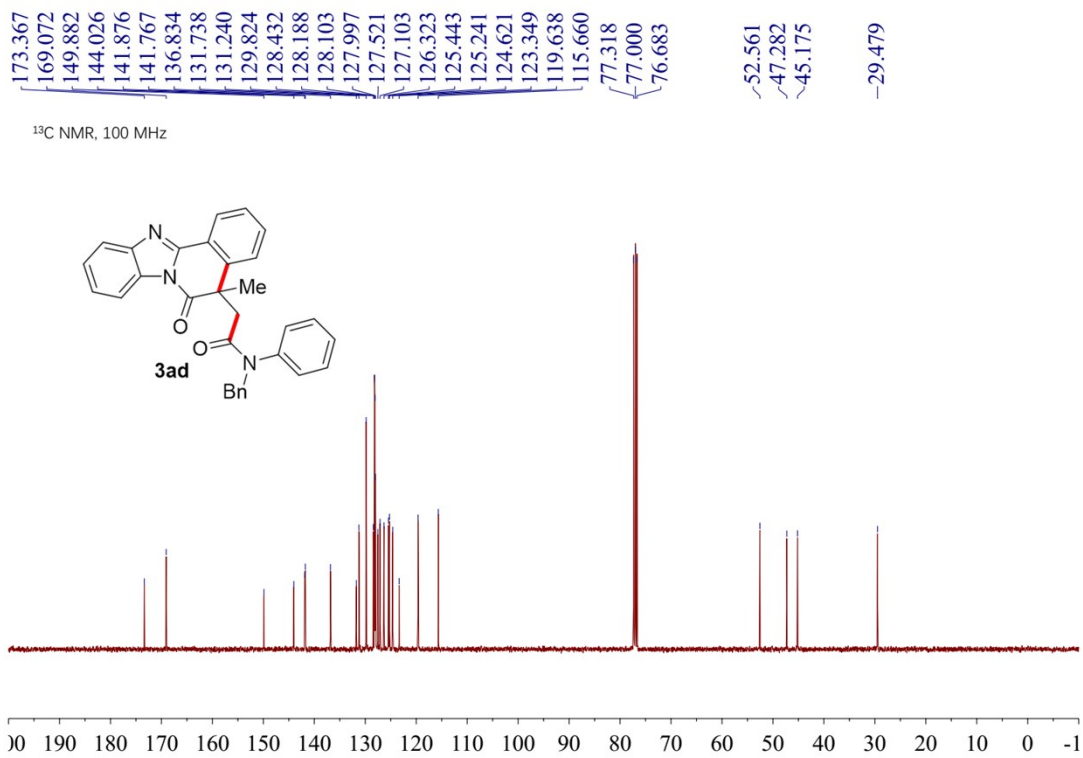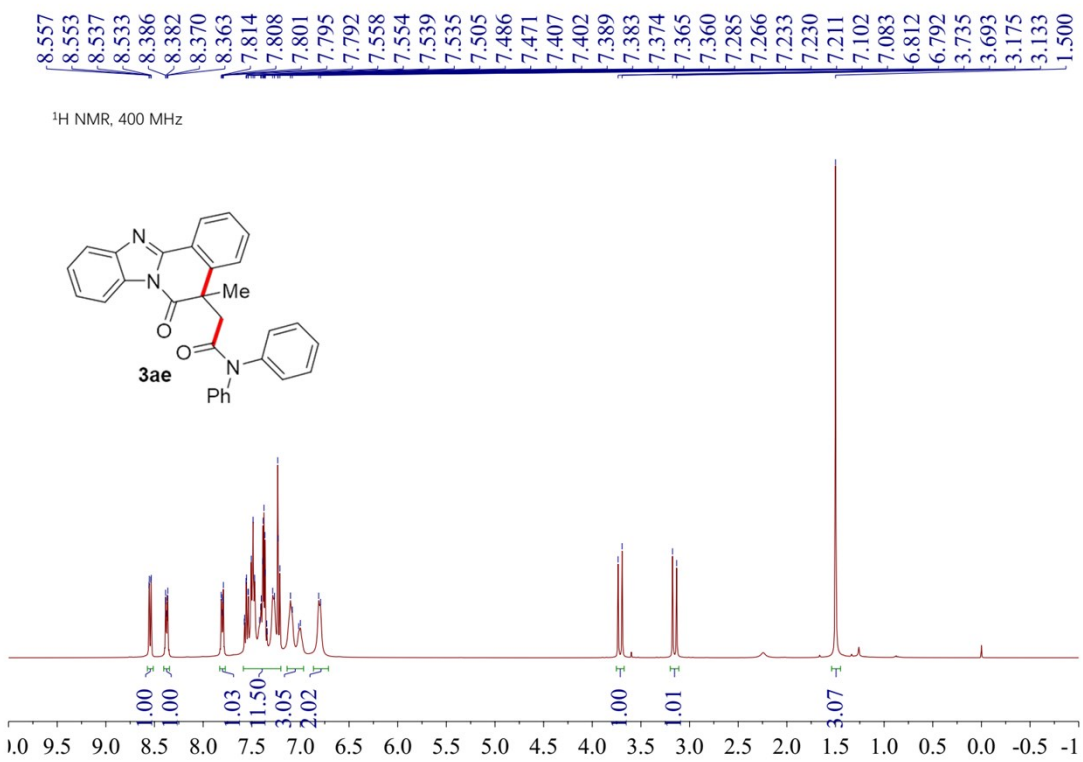

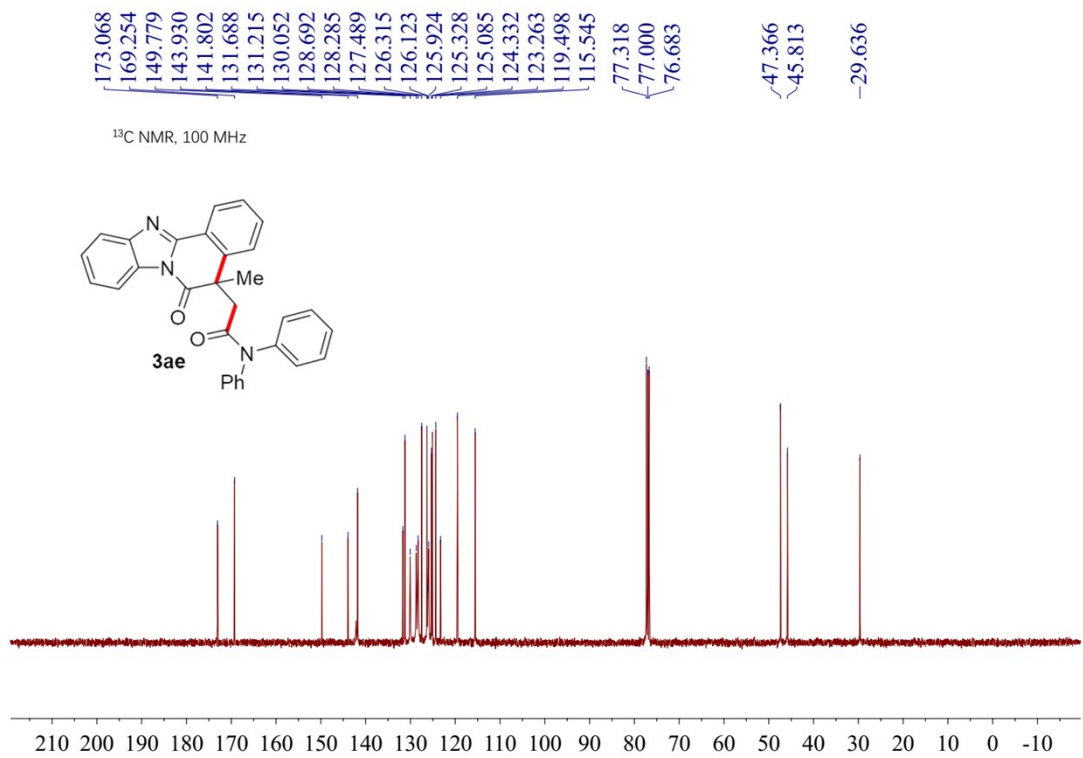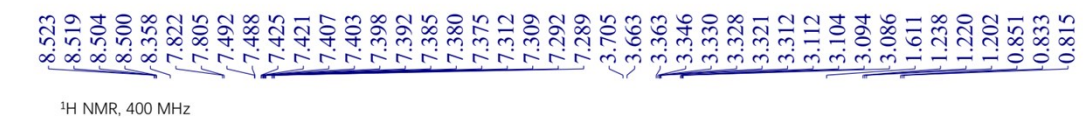

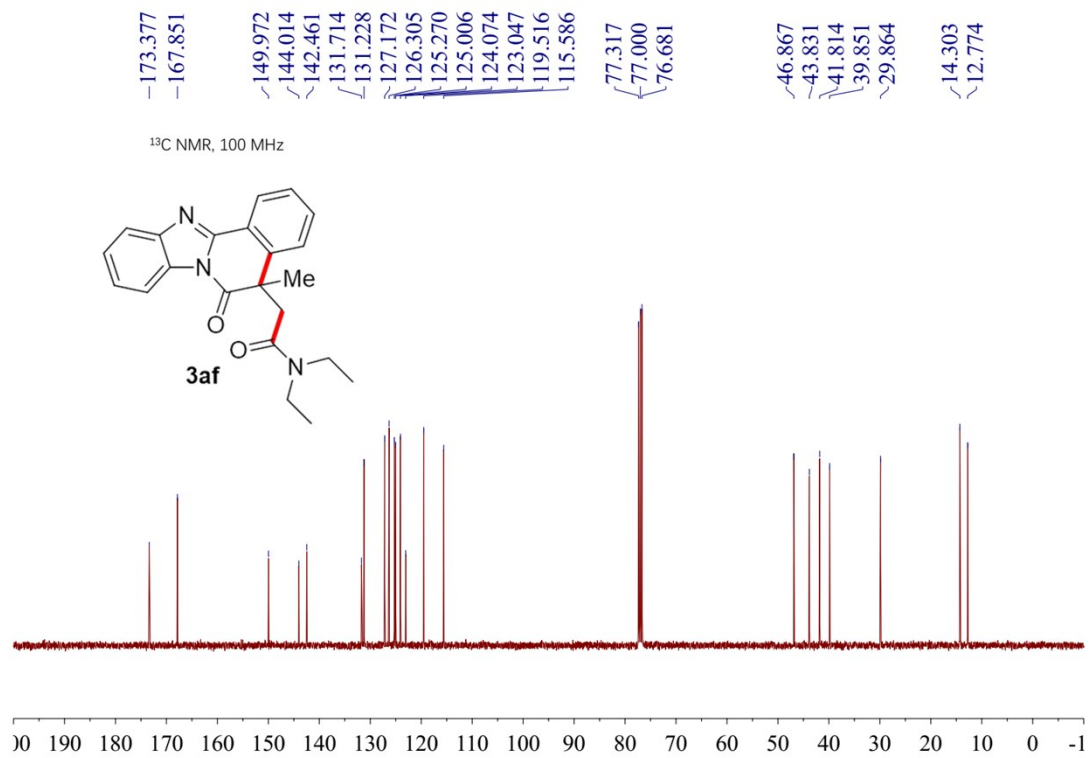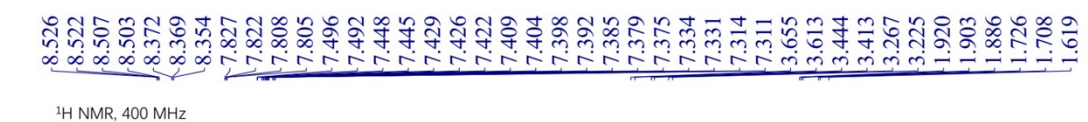

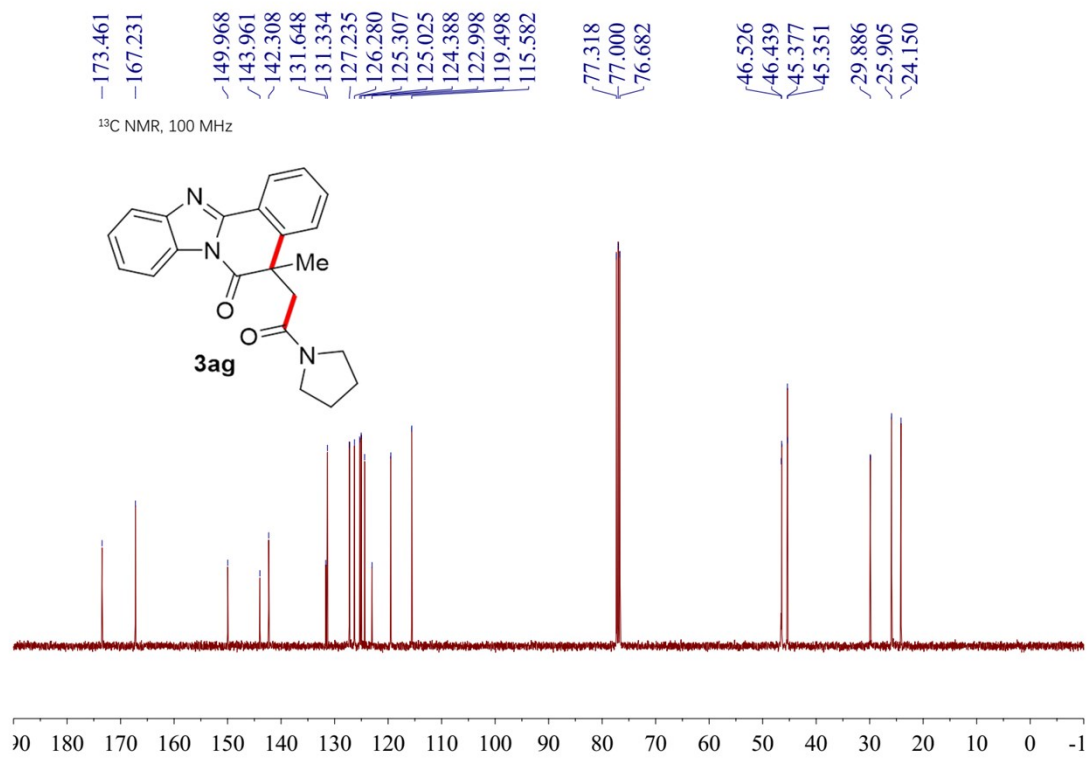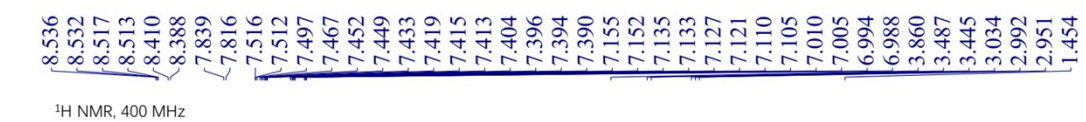

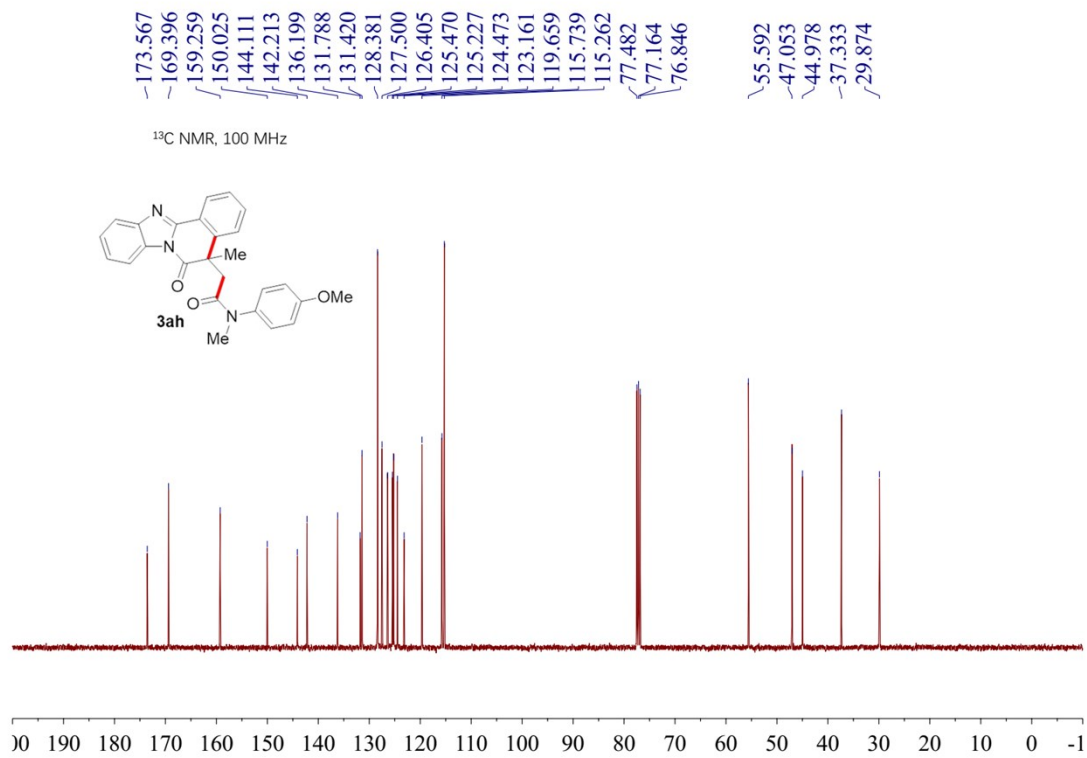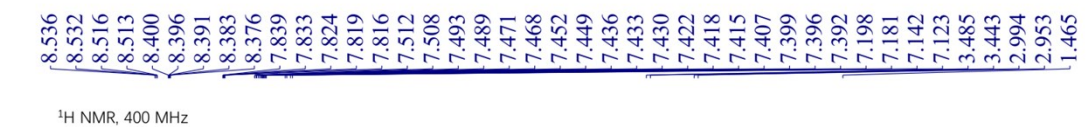



173.287  
 168.935  
 163.101  
 160.631  
 149.802  
 143.925  
 141.888  
 139.303  
 139.268  
 131.572  
 131.291  
 129.018  
 128.933  
 127.402  
 126.265  
 125.370  
 125.117  
 124.204  
 122.987  
 119.529  
 117.113  
 116.887  
 115.530  
 77.318  
 77.000  
 76.682  
 46.856  
 44.855  
 37.148  
 29.677

<sup>13</sup>C NMR, 100 MHz

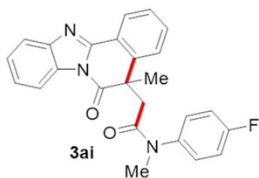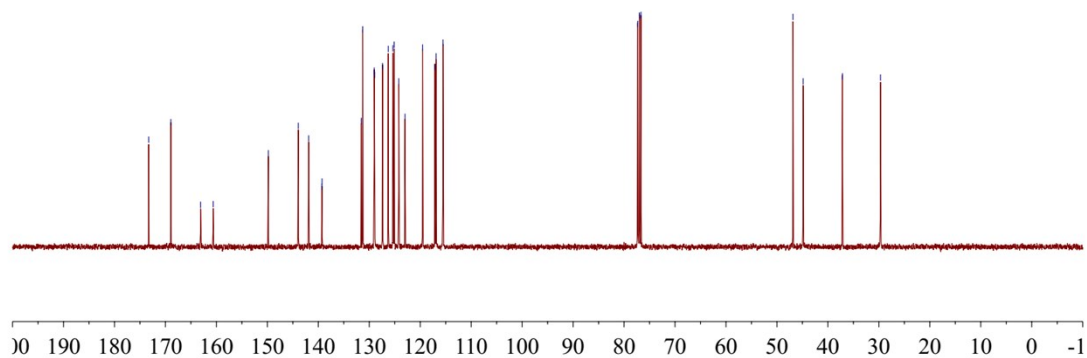

<sup>19</sup>F NMR, 377 MHz

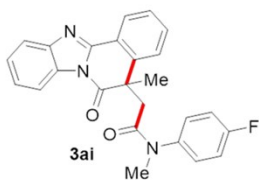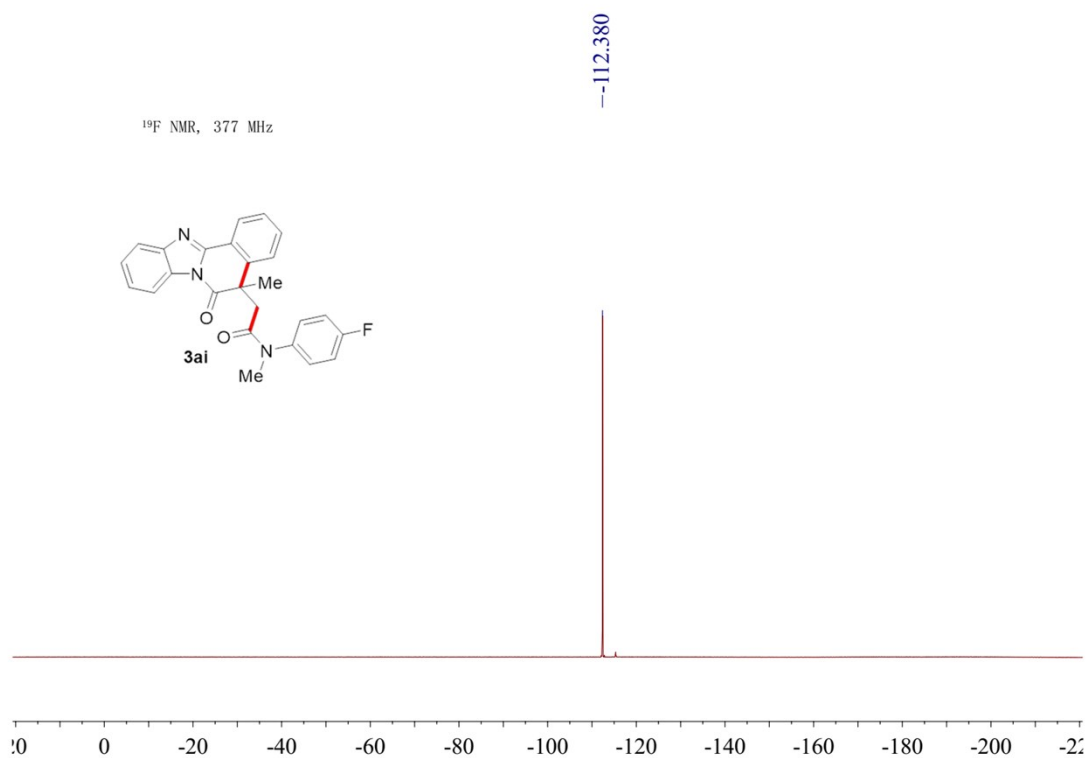

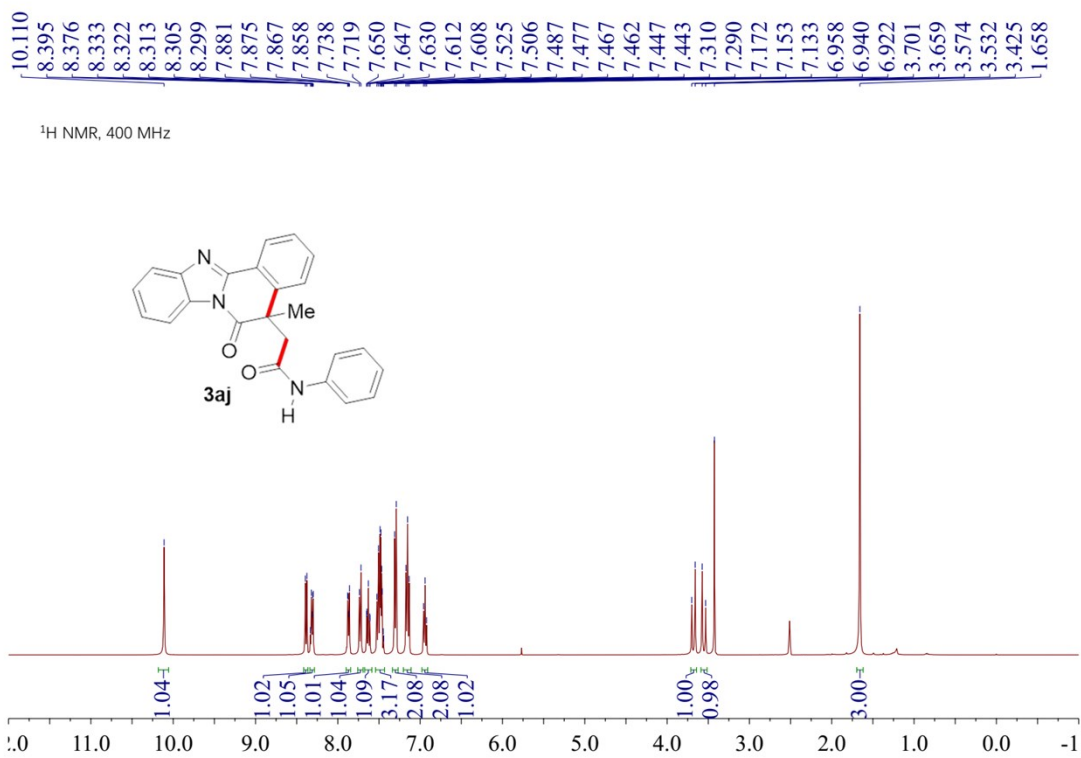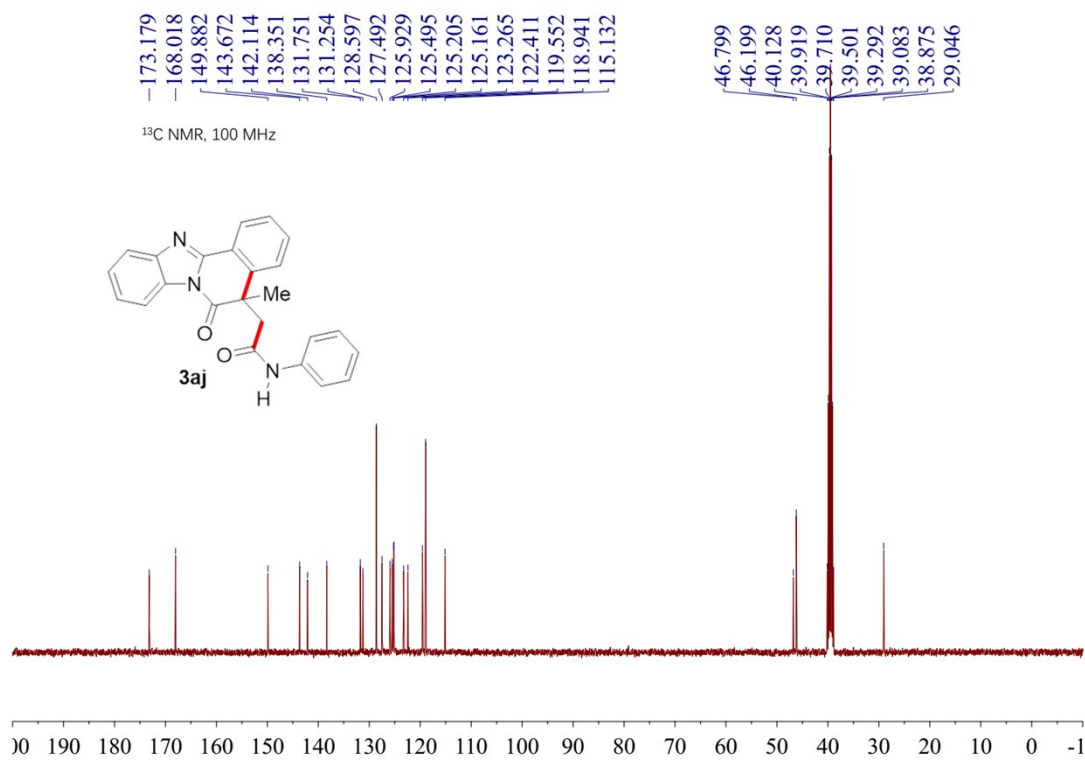

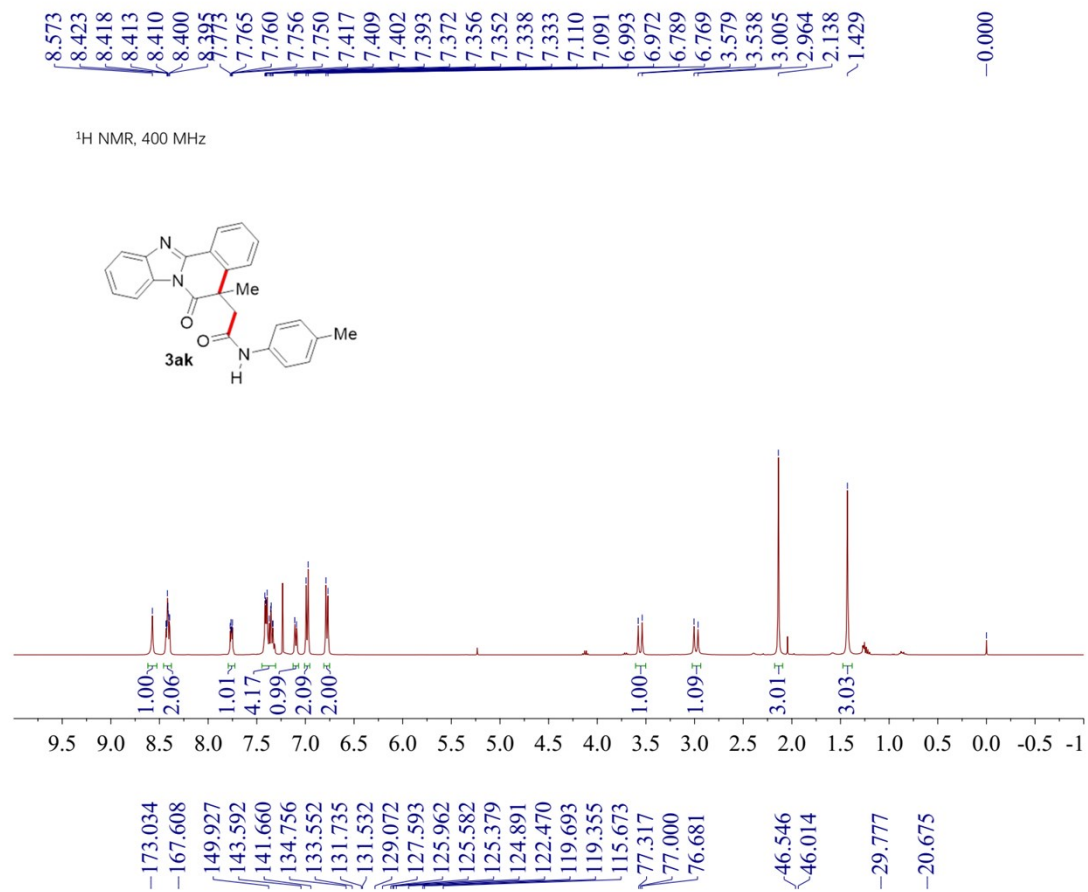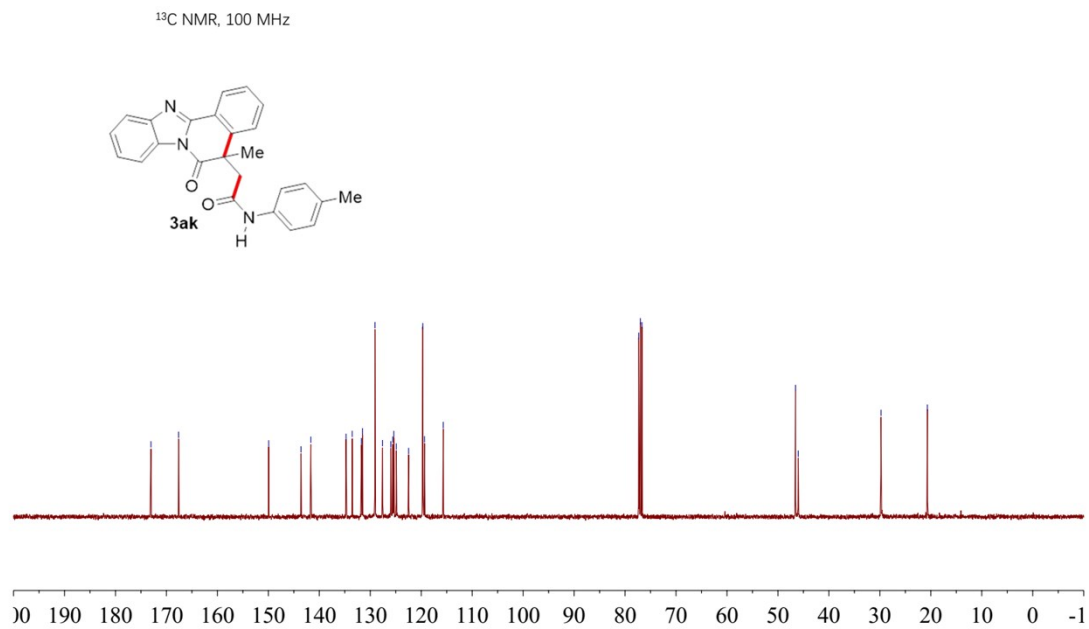

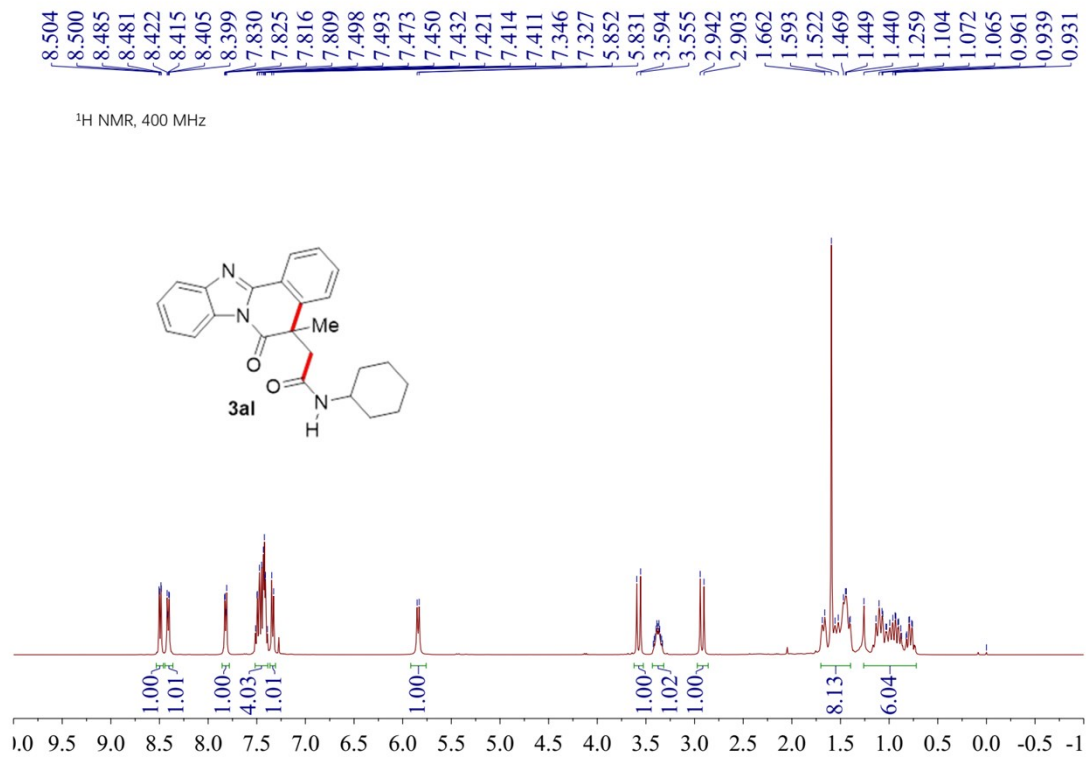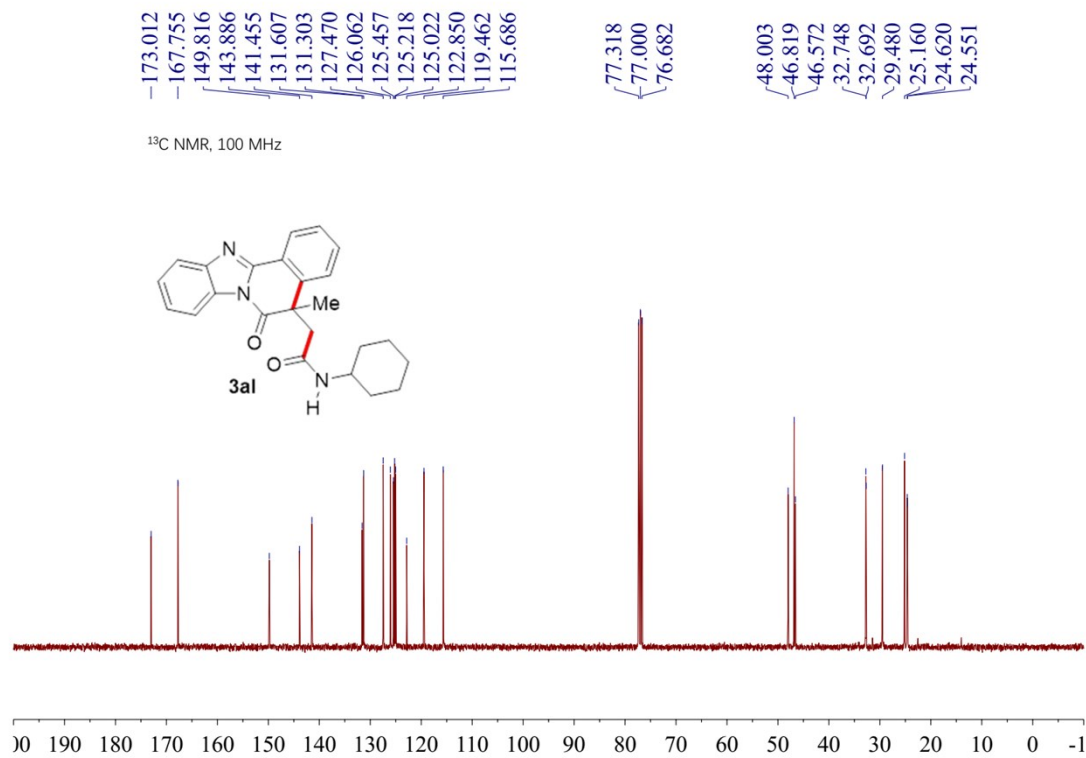

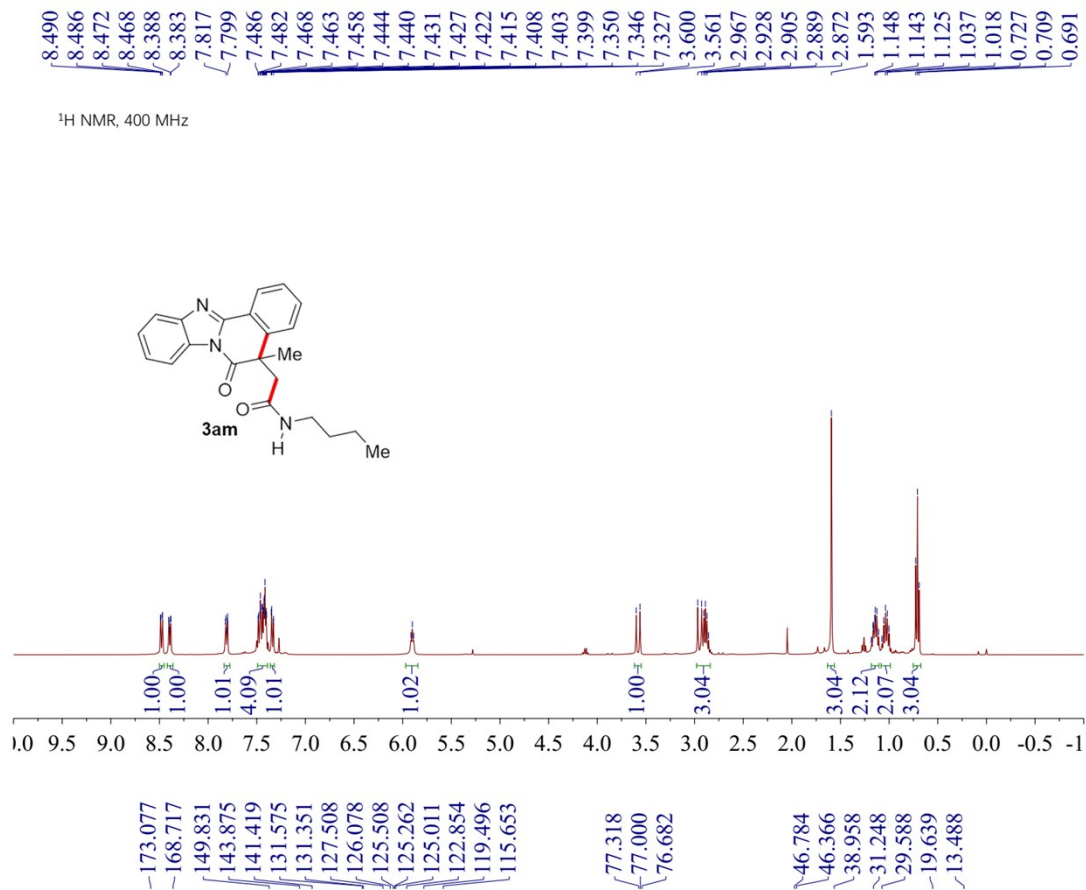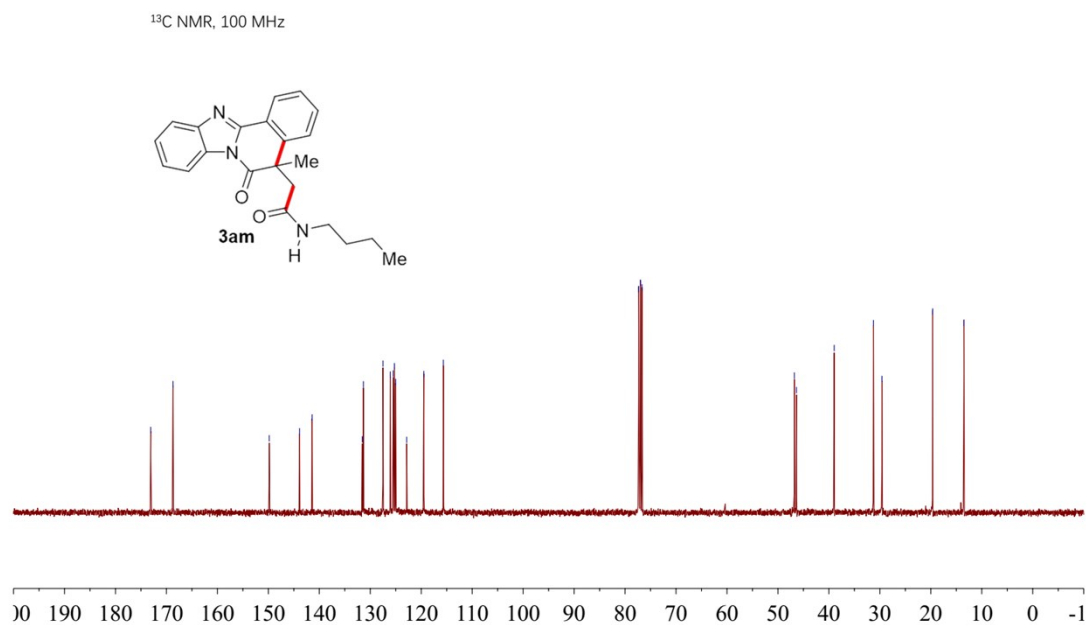

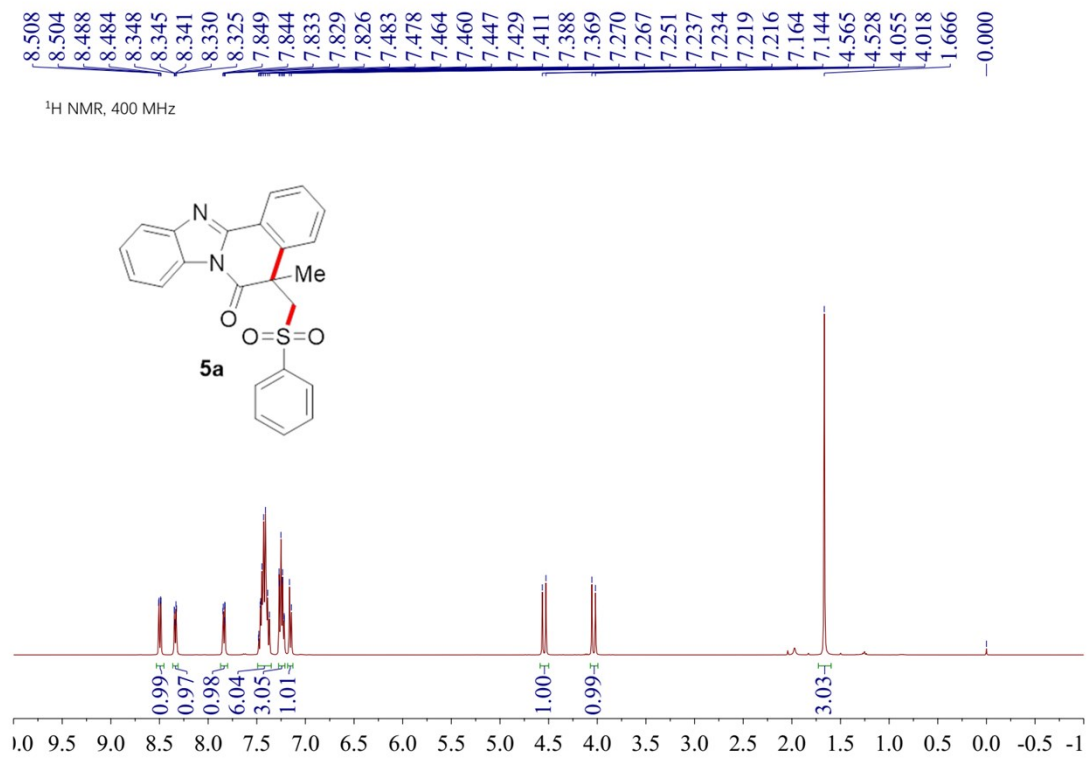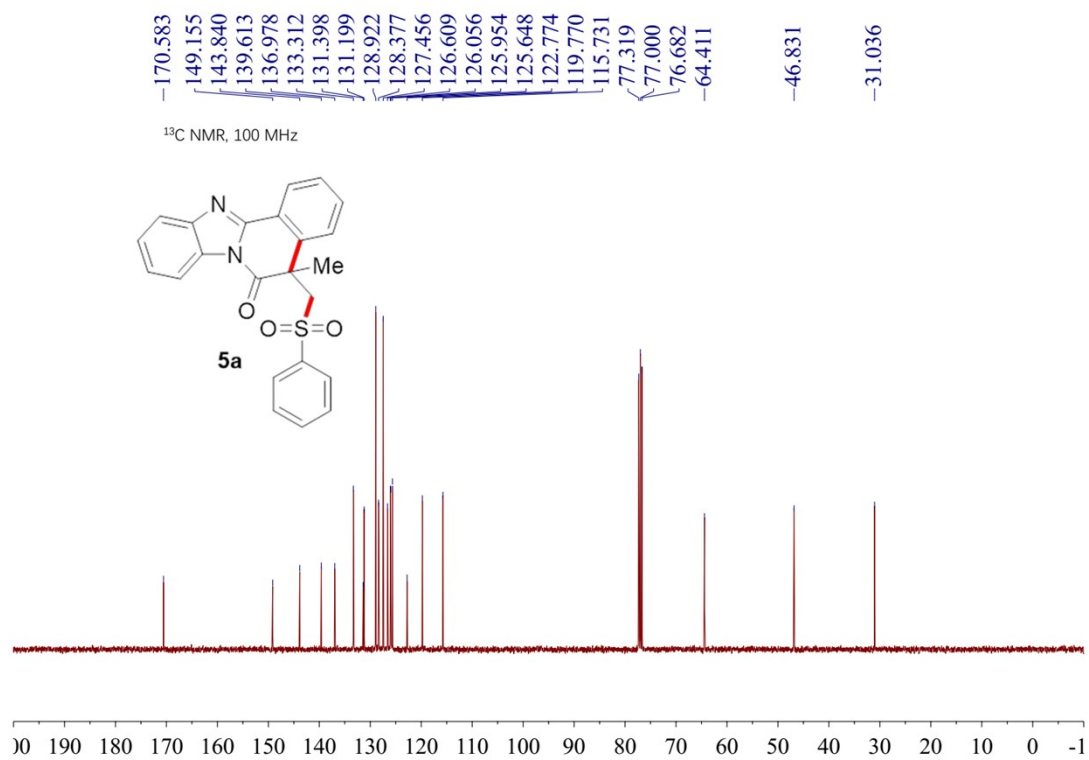

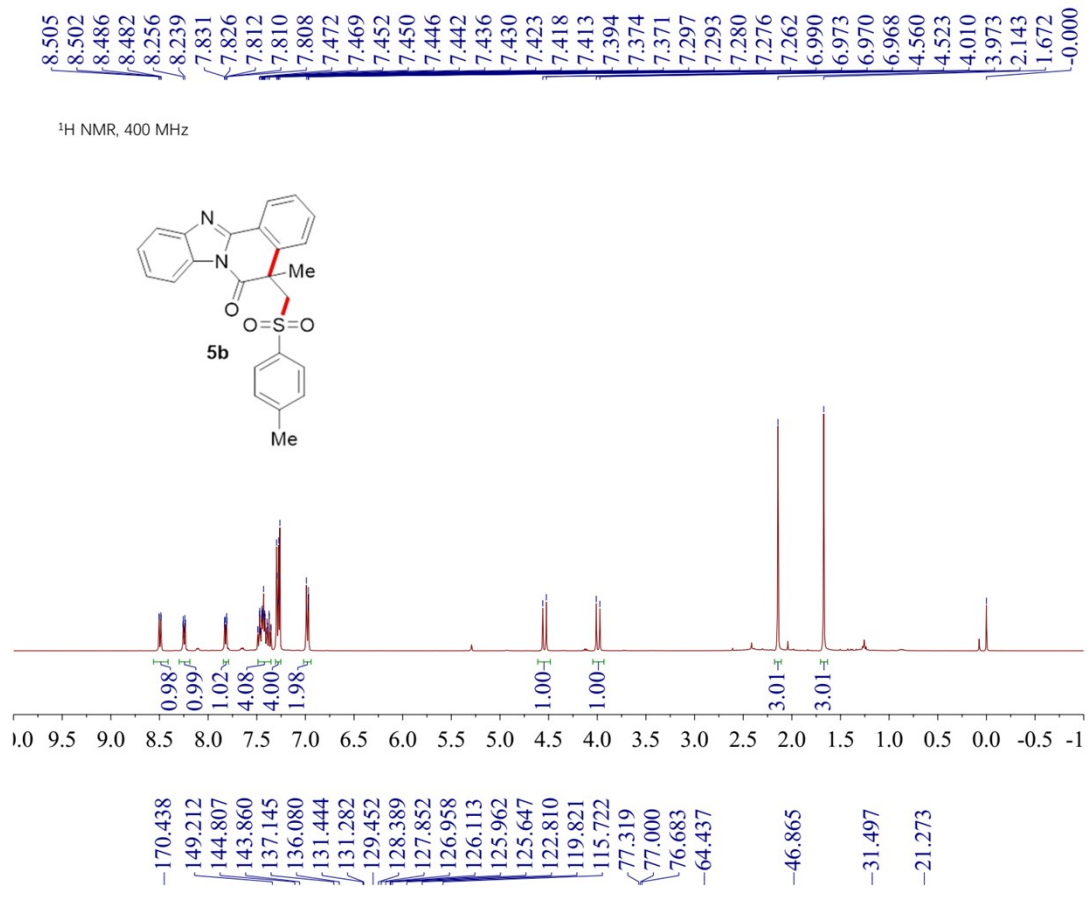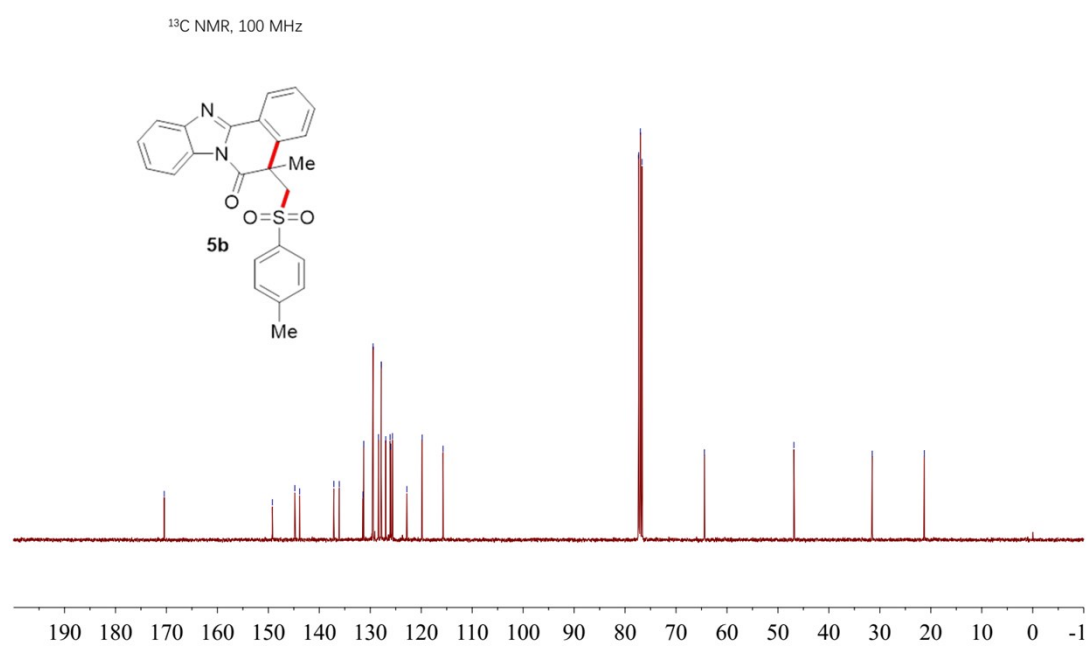

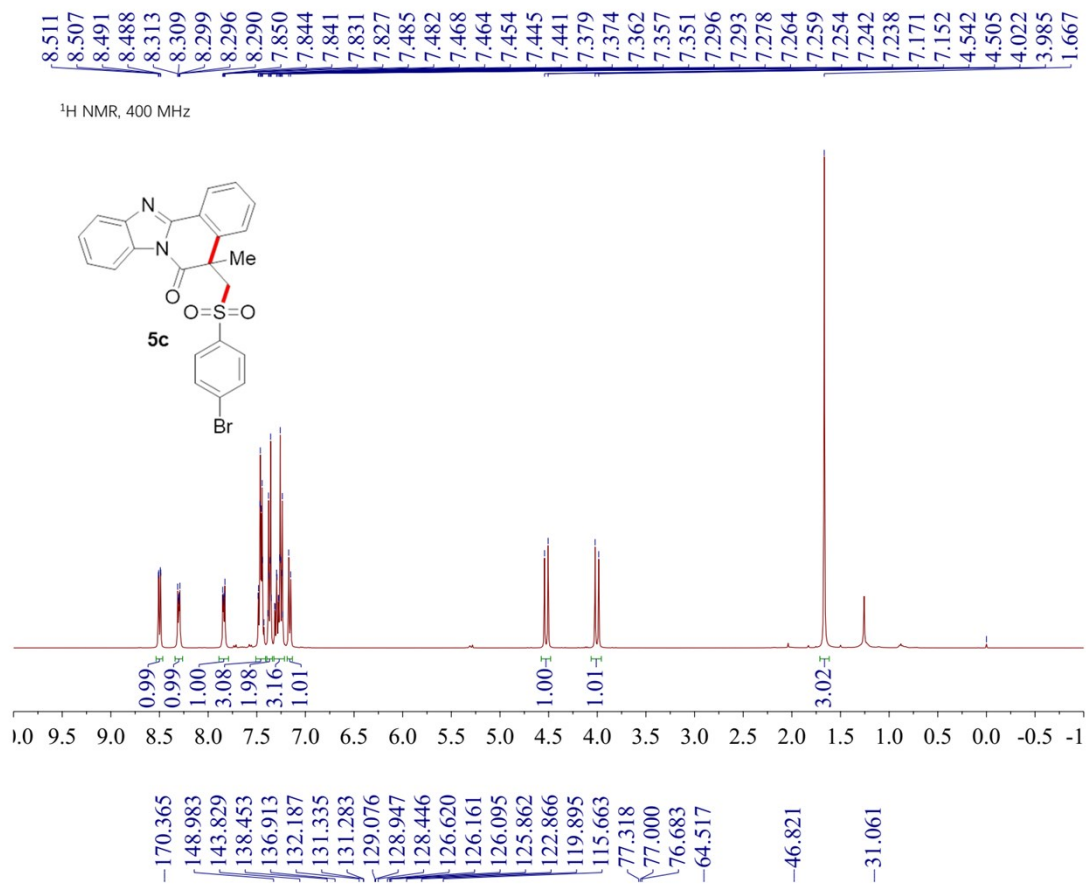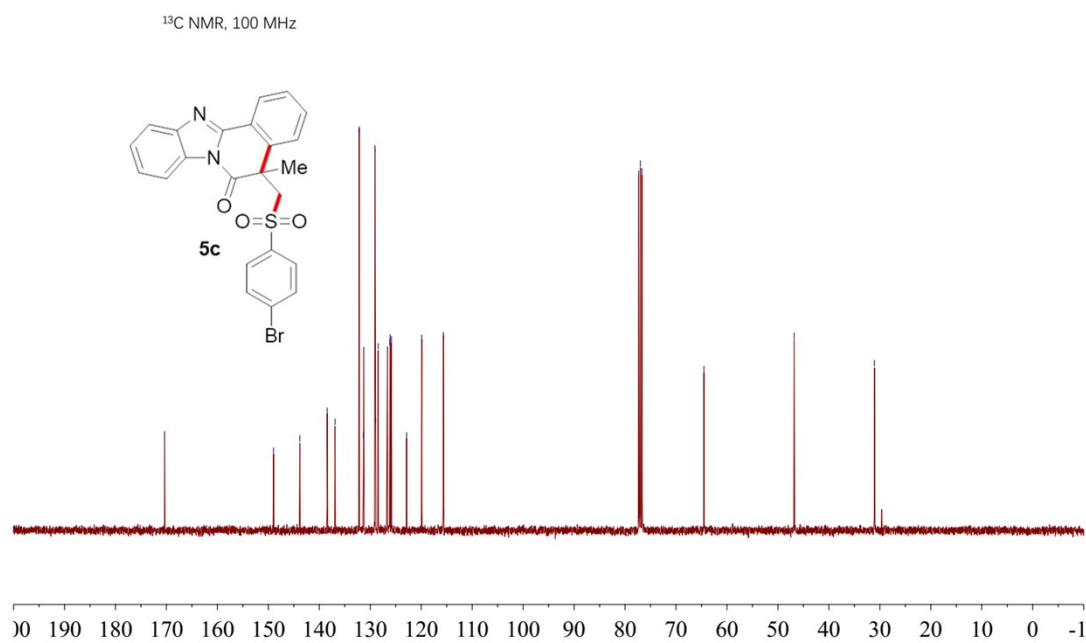



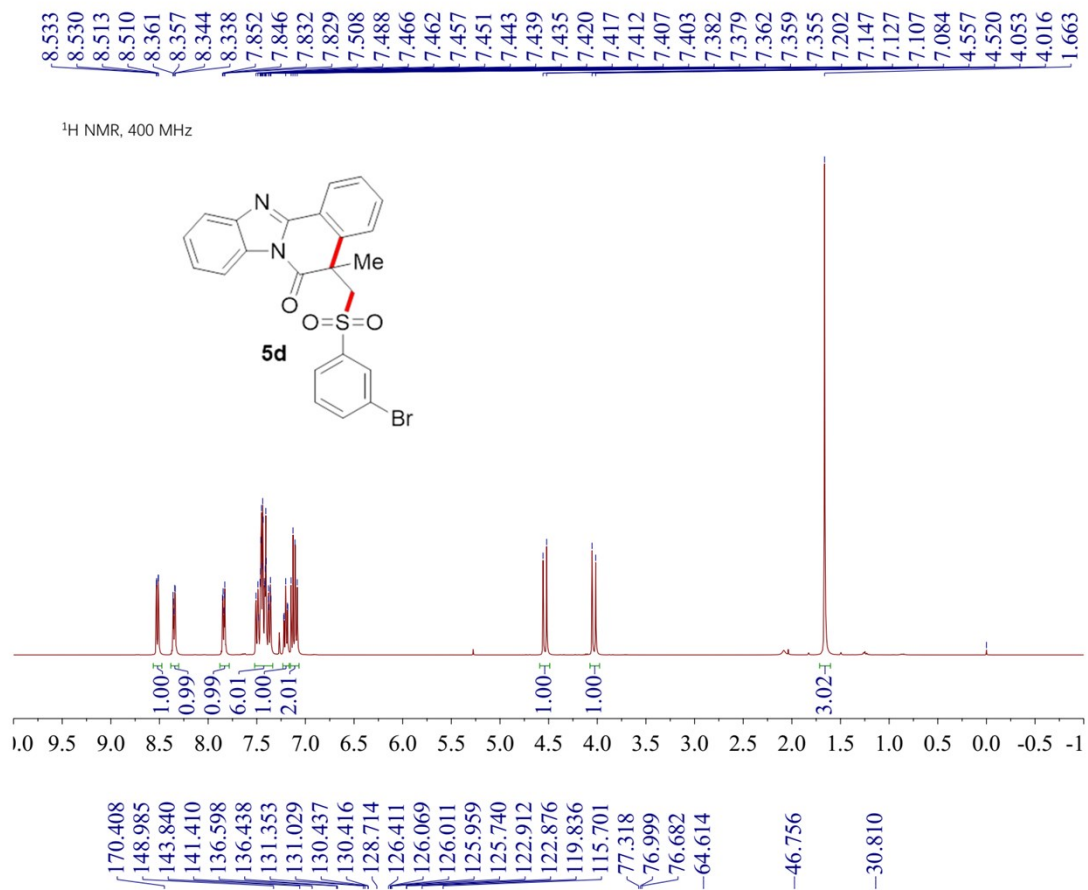

Supplement: d1ob00101a1.pdf [file d1ob00101a1.pdf]
